# Supplementary material for: Resveratrol Sensitizes Colorectal Cancer Cells to Cetuximab by Connexin 43 Upregulation-Induced Akt Inhibition
Source: PubMed Central journal article supplement (PMC7155766; doi:10.3389/fonc.2020.00383), 2020-04-07
Supplement: Data_Sheet_1.pdf [file Data_Sheet_1.pdf]

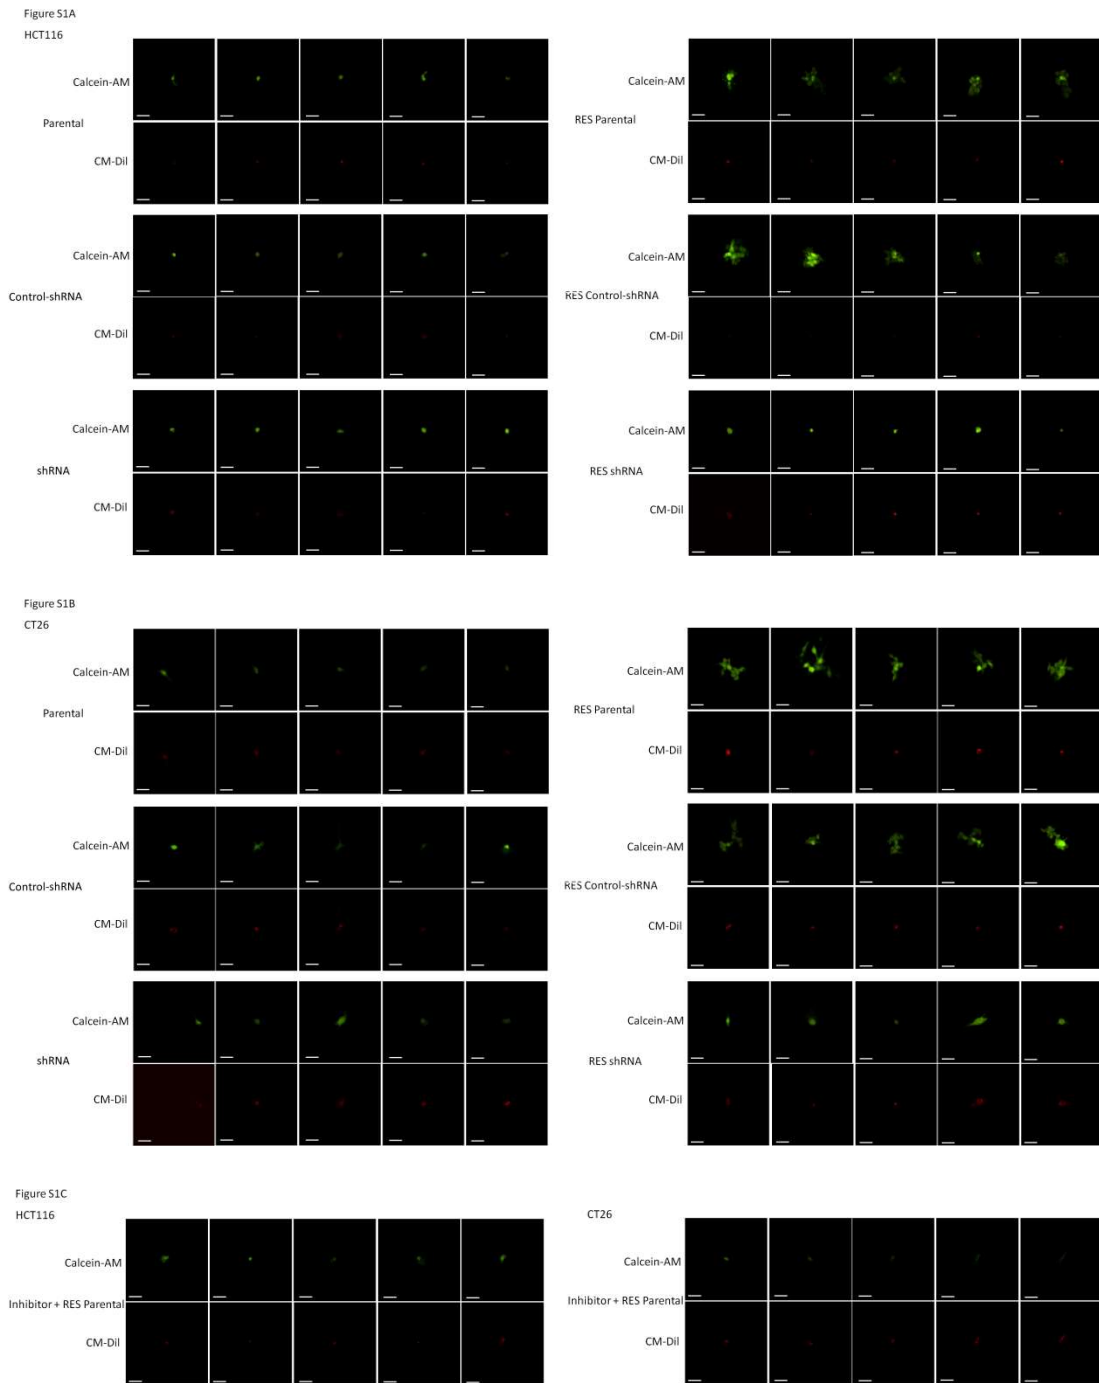

**Figure S1.** Five independent experiments of “Parachute” dye-coupling assay. Scale bars are 20  $\mu\text{m}$ . (A, B) Five independent experiments of Figure 1B. (C) “Parachute” dye-coupling assay of cells which were pretreated with 50 $\mu\text{M}$  carbenoxolone for 12 h and treated with 5 $\mu\text{g}/\text{ml}$  resveratrol for 24 h. “Inhibitor” represents carbenoxolone. It is a significant difference ( $P < 0.05$ ) in GJ function between “Inhibitor+RES Parental” group of and “RES Parental” group by one-way ANOVA comparison.

Figure S2

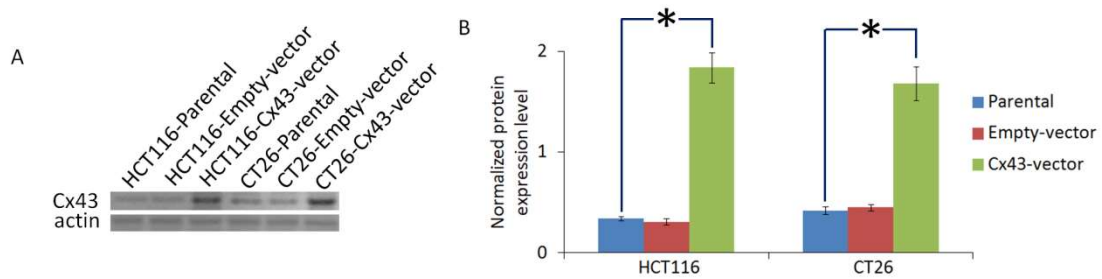

**Figure S2.** Cx43 expression is upregulated by transfection of Cx43-pTARGET vector.

(A) Western blot images of Cx43 expression in empty-vector or Cx43-vector transfected HCT116 and CT26 cells. The full length blots are shown as Figure S7B.

(B) Bar diagrams of densitometric analysis. Protein expression level is normalized by  $\beta$ -actin. Columns show the mean  $\pm$  SEM. All other groups were compared with the Parental group using one-way ANOVA. \* $P < 0.05$  represents a significant difference from values in the Parental group.

Figure S3A

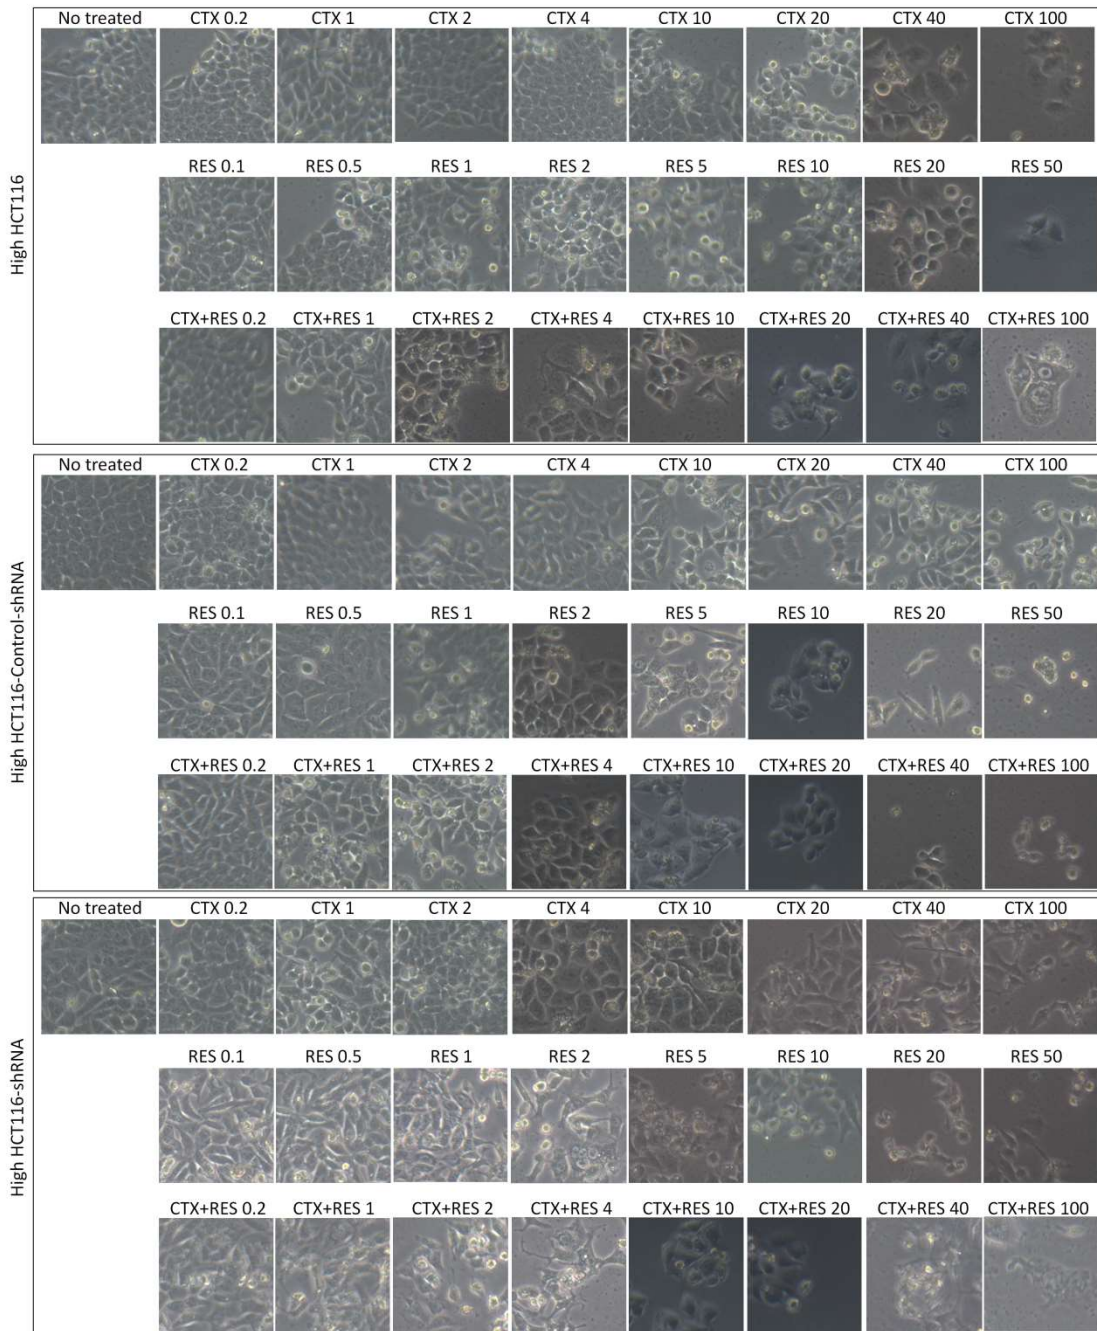

Figure S3B

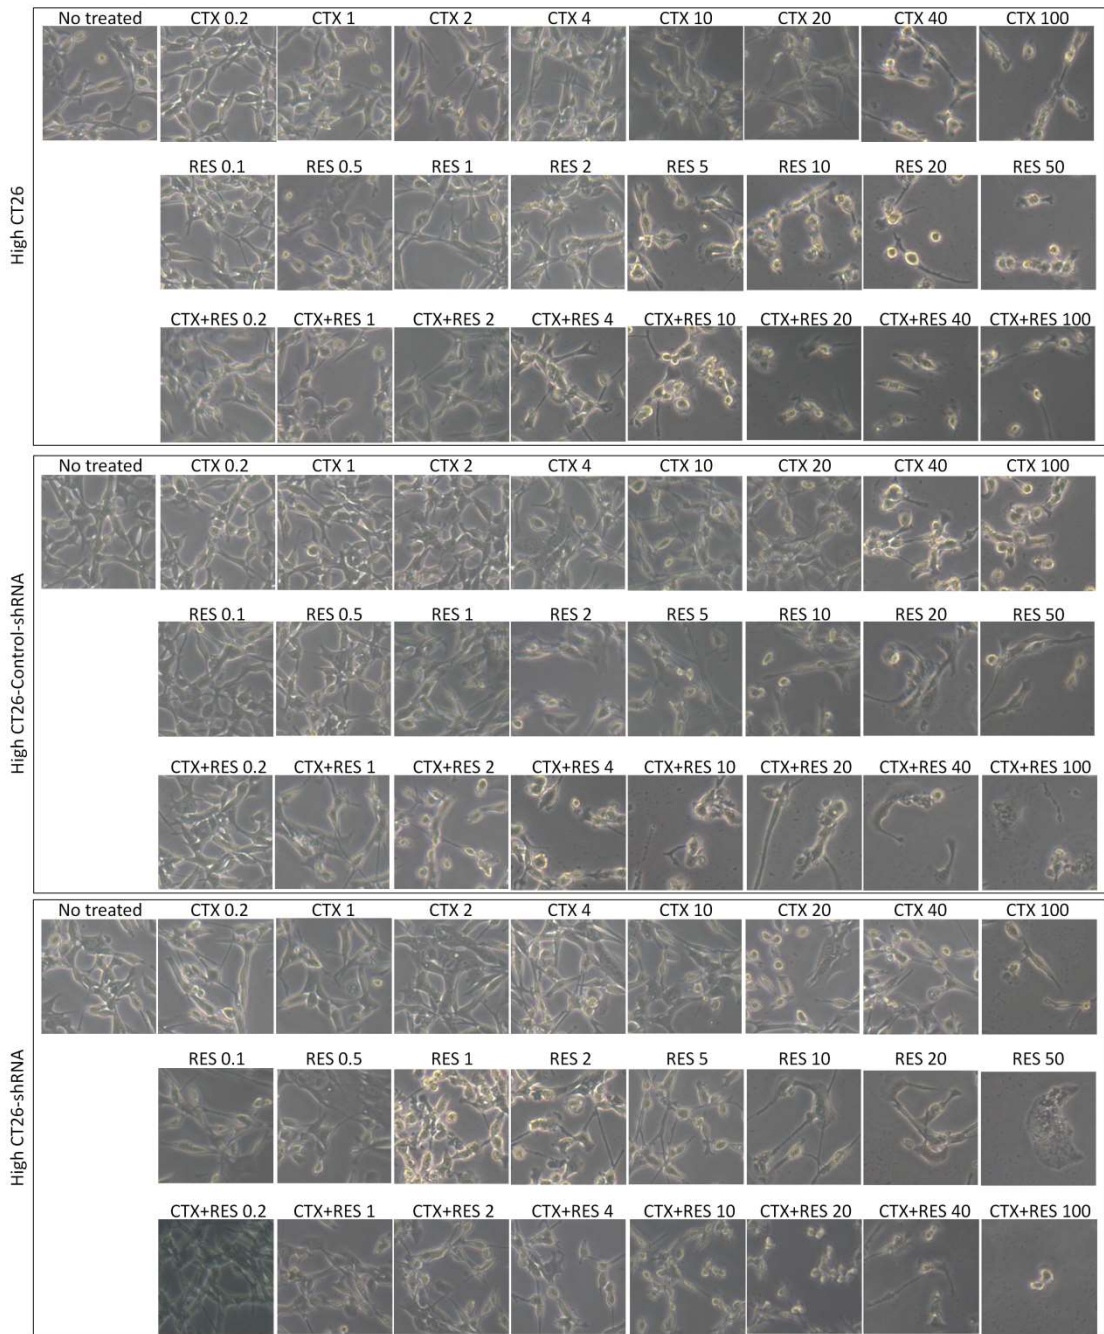



Figure S3C

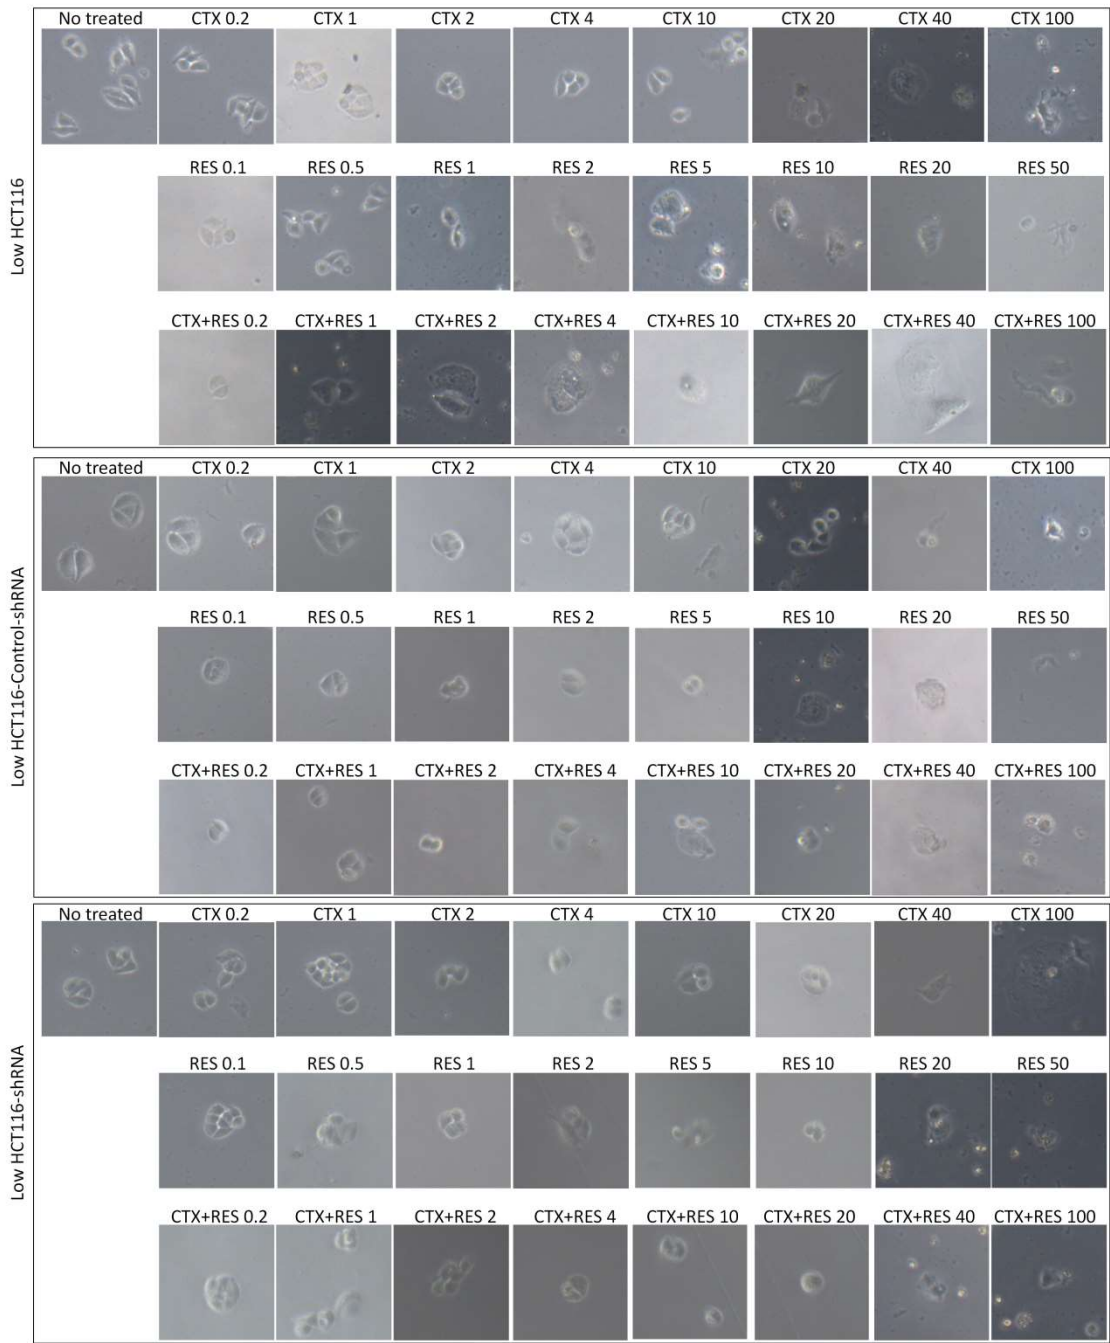

Figure S3D

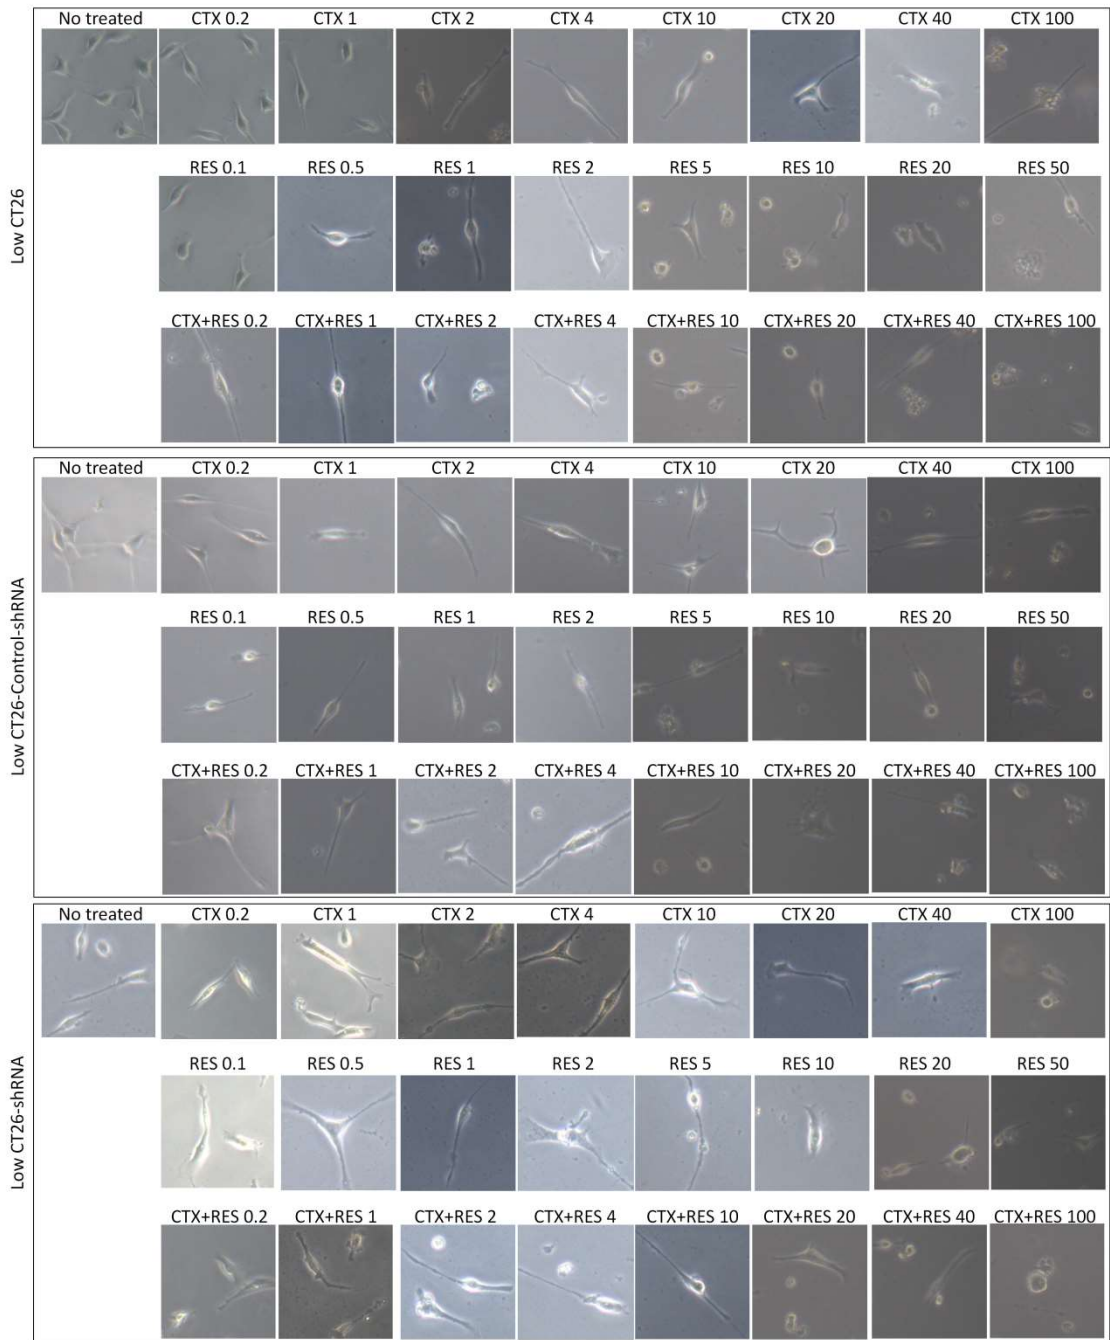



Figure S3F

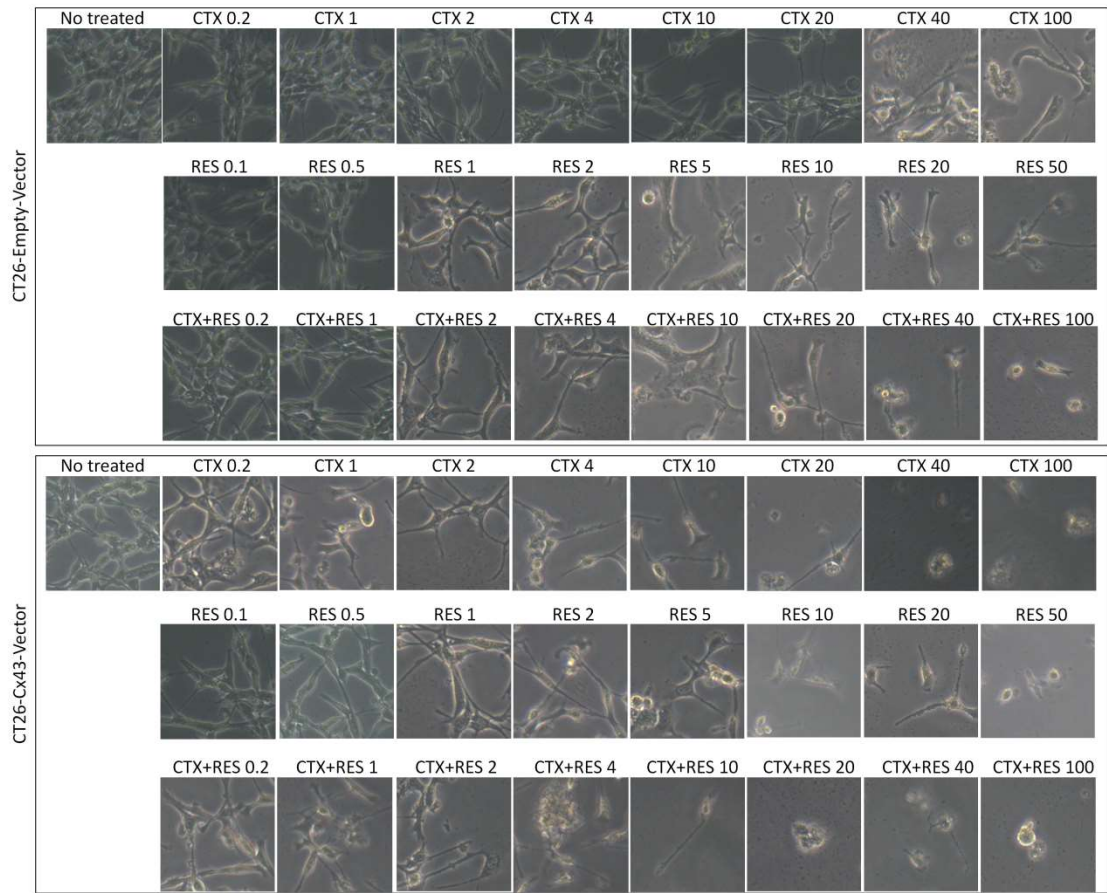



Figure S3G

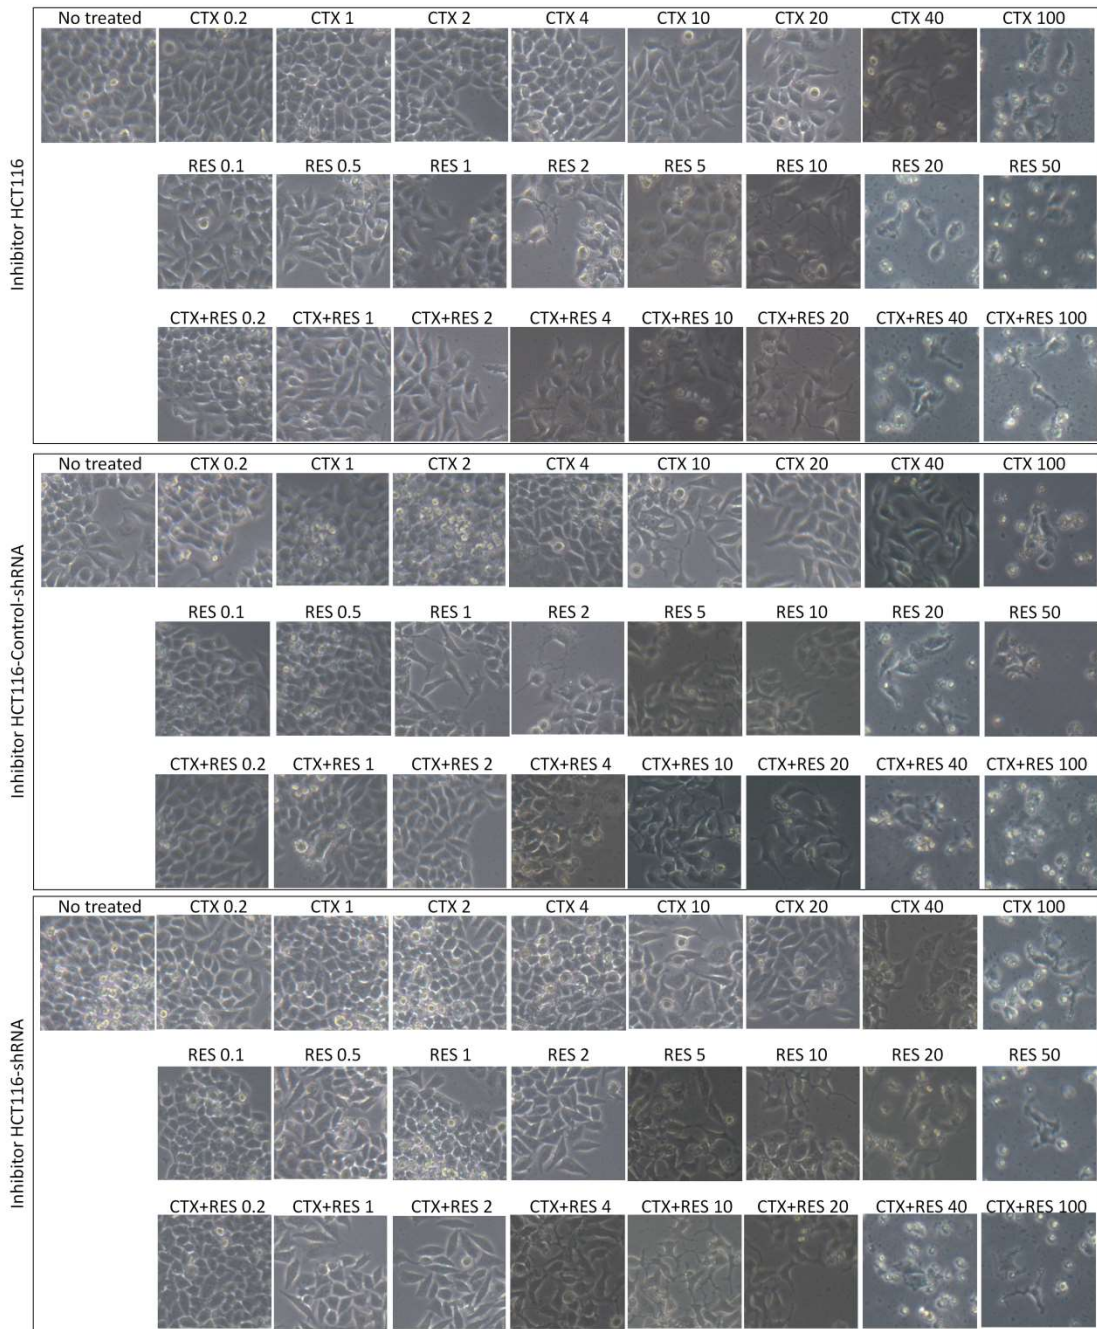

Figure S3H

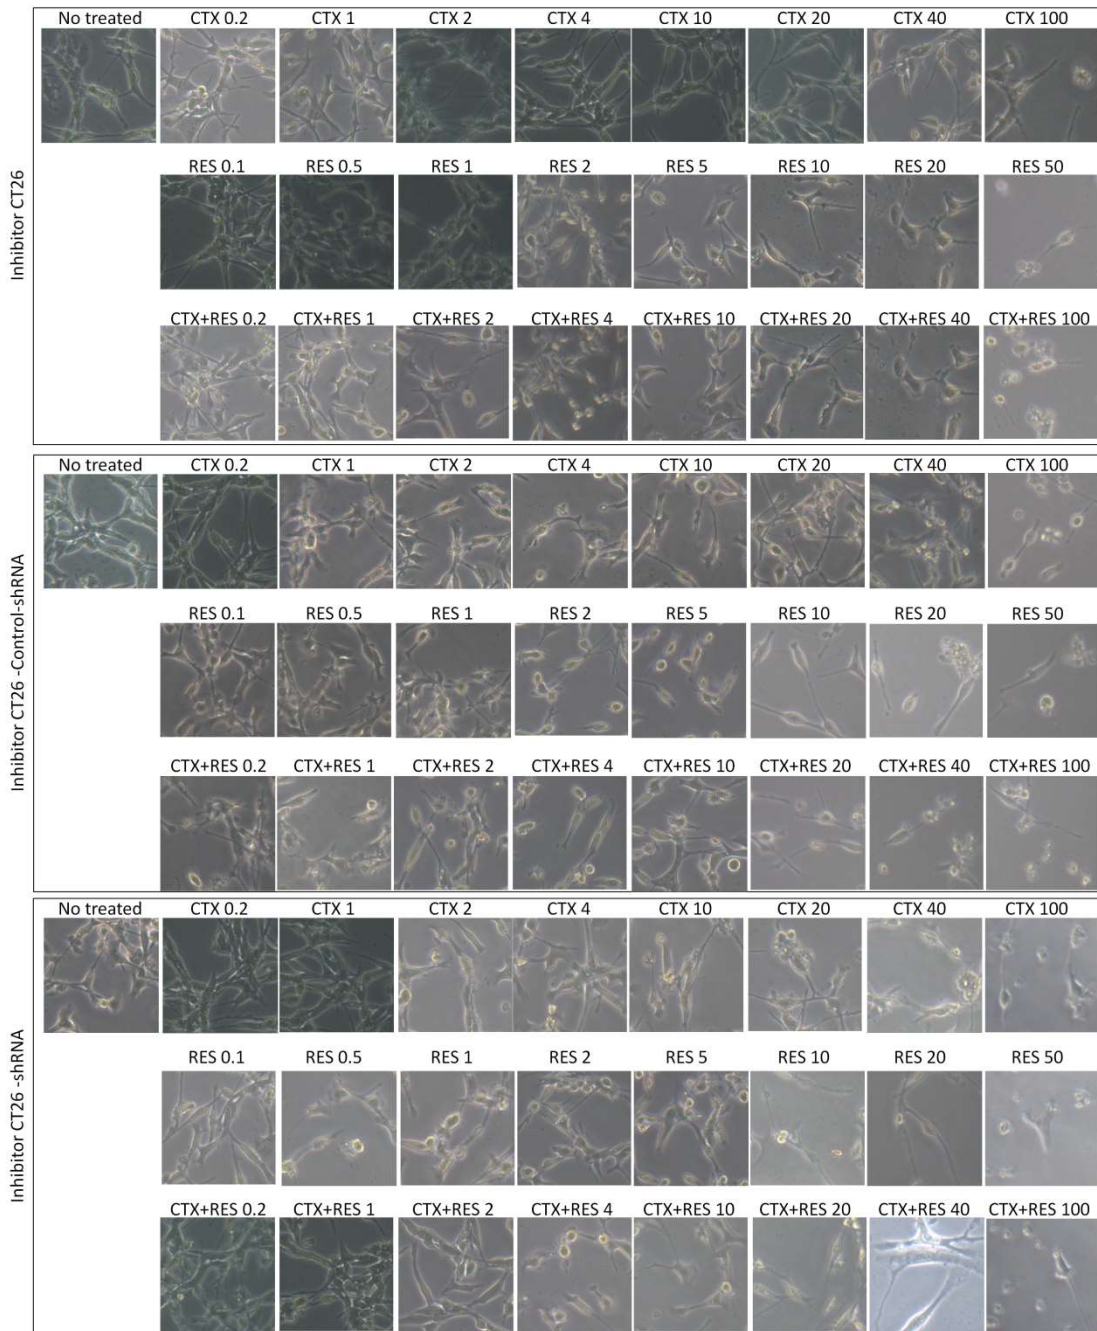

**Figure S3.** Photomicrographs of the cells under different treatments. “CTX” represents cetuximab treatment, “RES” represents resveratrol treatment, “CTX+RES” represents combination treatment. The number represents concentration ( $\mu\text{g}/\text{mL}$ ) of drug, and the number of “CTX+RES” represents concentration of cetuximab. “Inhibitor” represents carbenoxolone pretreatment.

Figure S4A

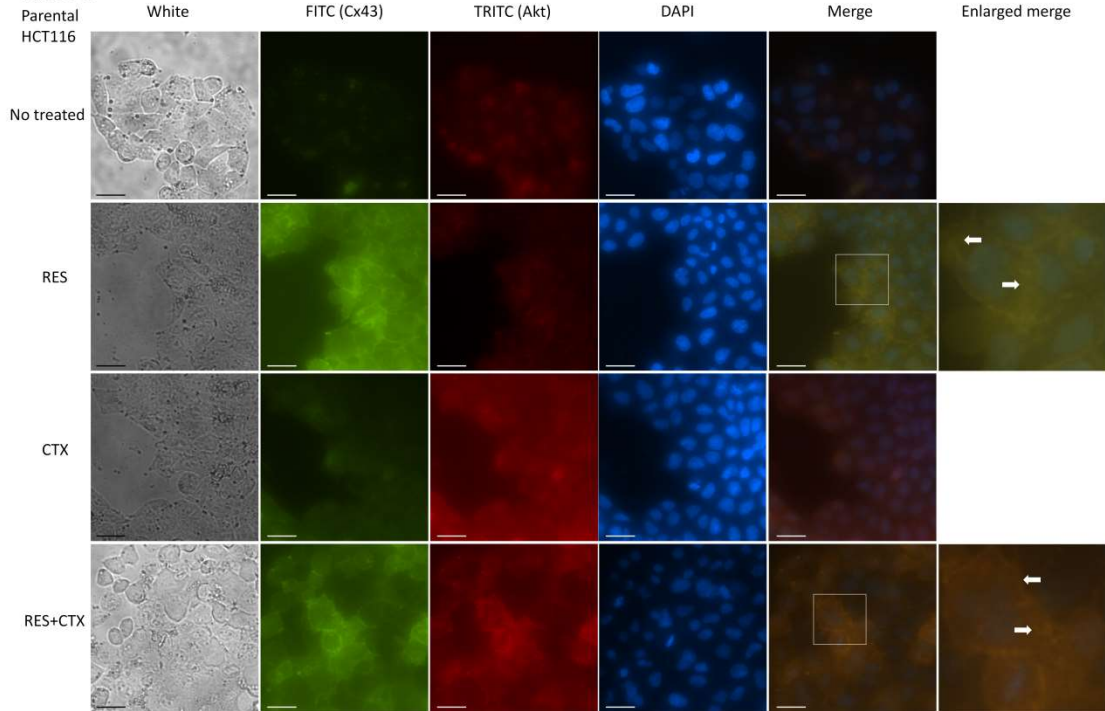

Figure S4B

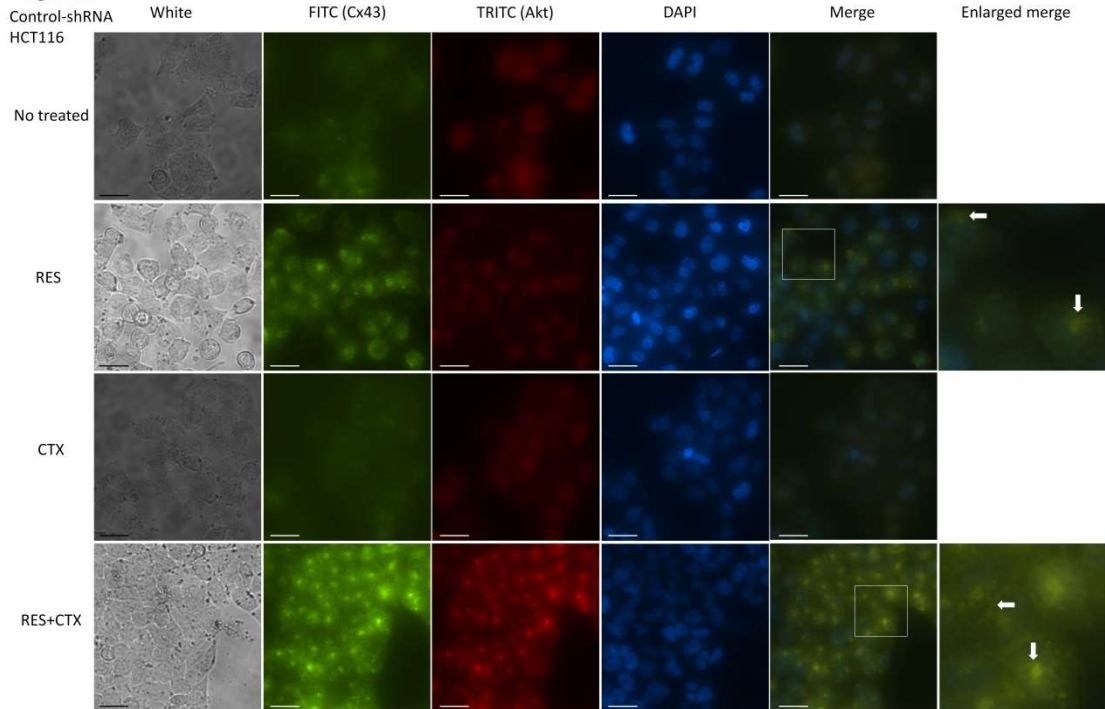



Figure S4C  
shRNA  
HCT116

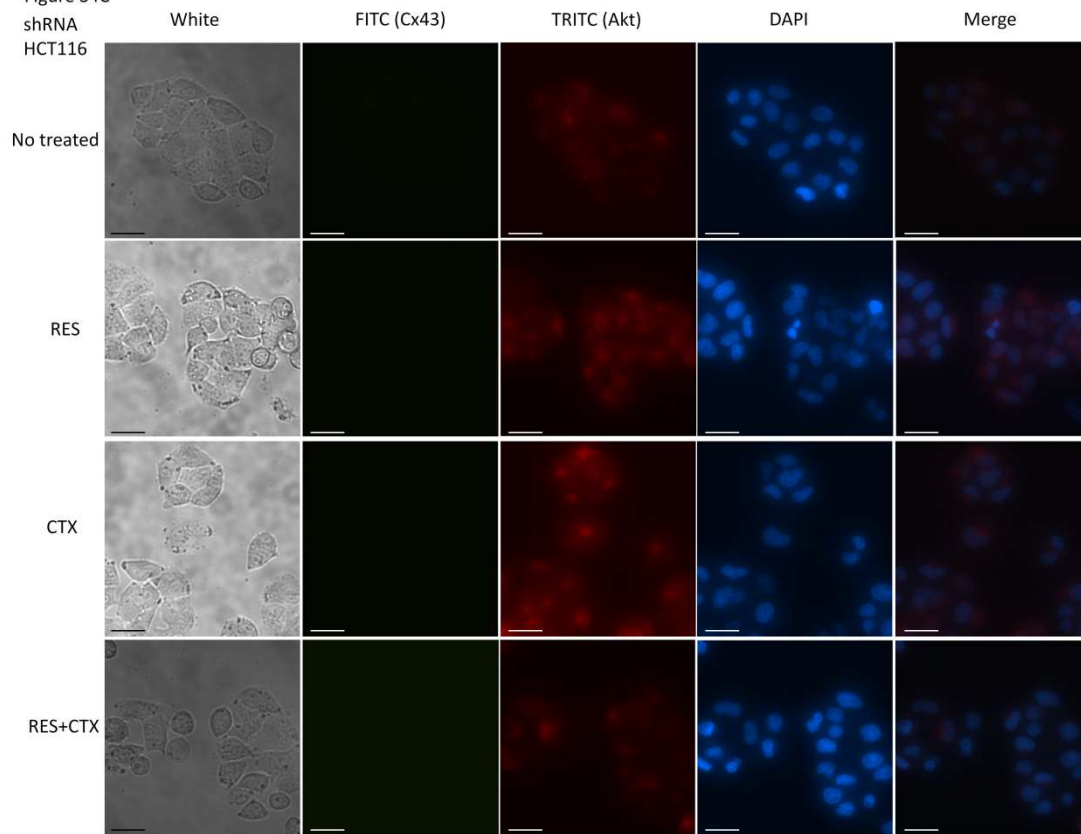

Figure S4D  
Parental  
CT26

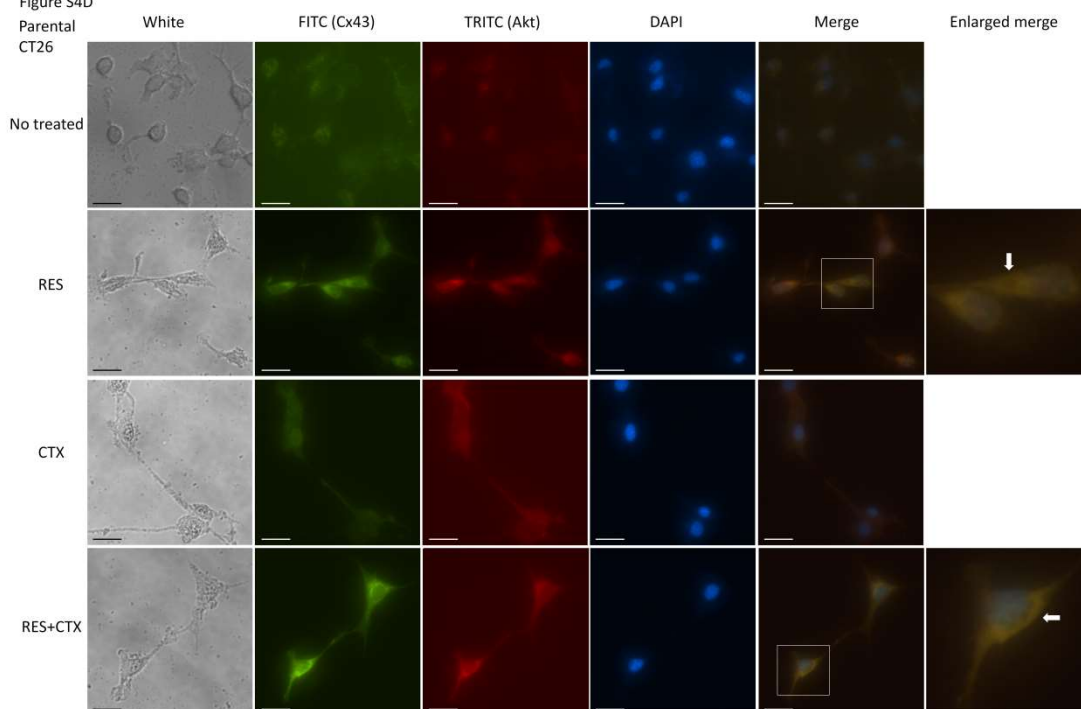



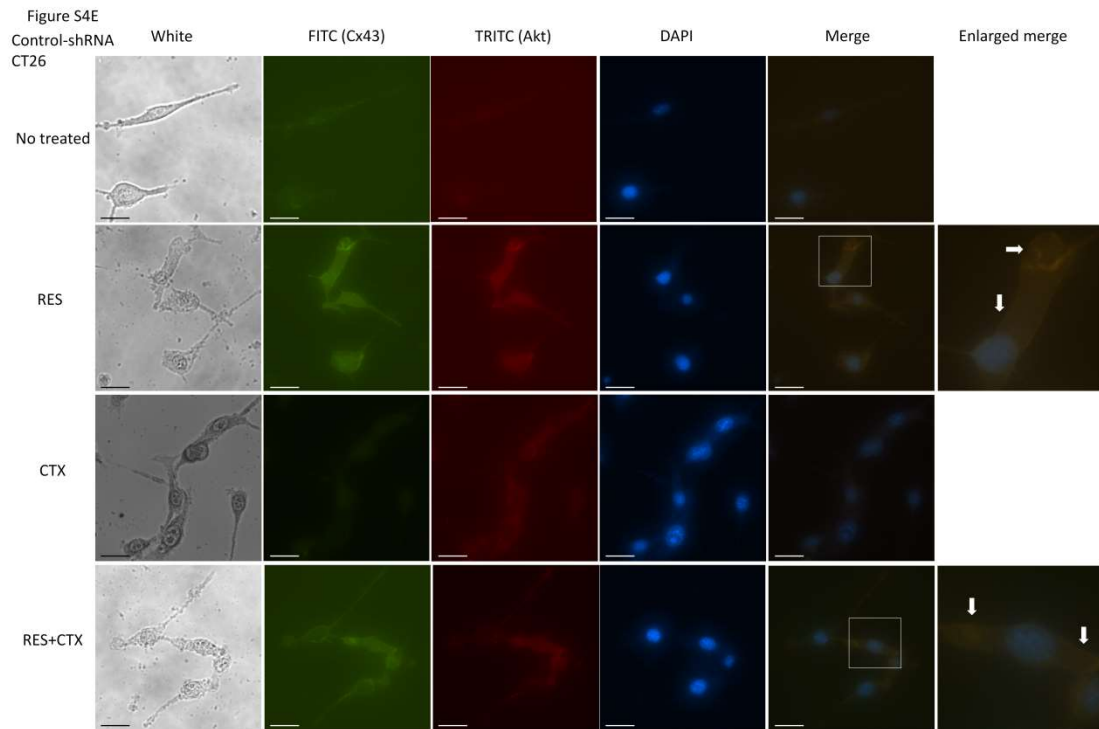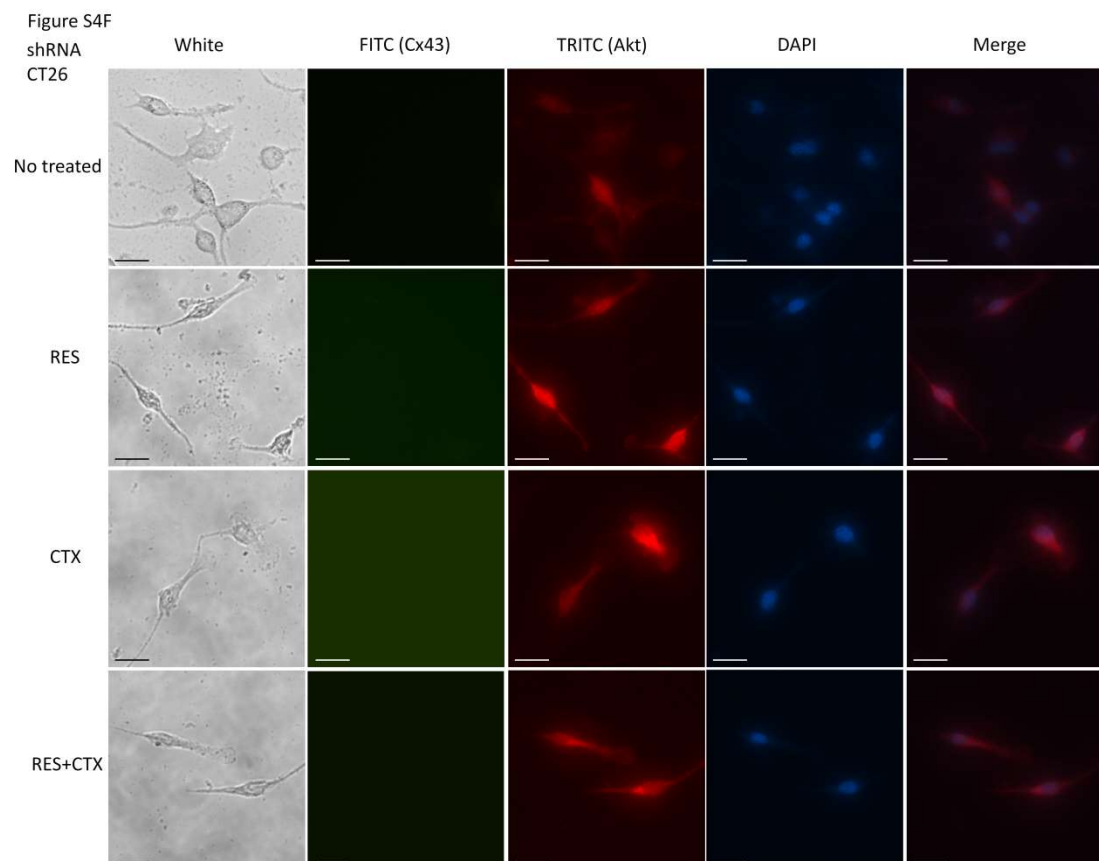

**Figure S4.** The location of Cx43 and Akt expression in parental and Cx43-shRNA-transfected cells. “RES” represents resveratrol-treated cells, “CTX” represents cetuximab-treated cells, “RES+CTX” represents the combination of resveratrol- and

cetuximab-treated cells. Cells were immunostained with Cx43 and Akt antibodies, which were followed by FITC- and TRITC-conjugated antibodies. Some area is enlarged to show colocalization of Akt and Cx43. Scale bars are 20  $\mu$ m. (A) Parental HCT116 cells. (B) Control-shRNA transfected HCT116 cells. (C) shRNA transfected HCT116 cells. (D) Parental CT26 cells. (E) Control-shRNA transfected CT26 cells. (F) shRNA transfected CT26 cells.

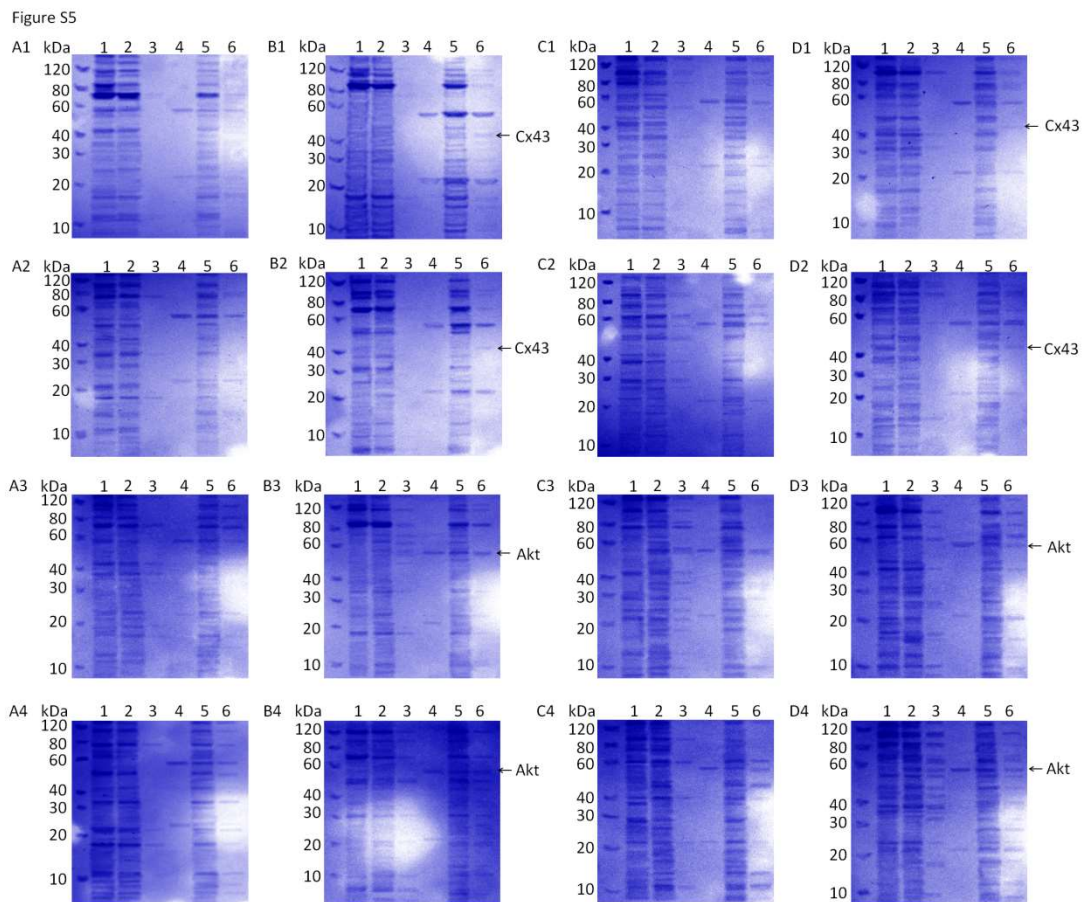

**Figure S5.** SDS-PAGE of immunoprecipitation analysis in parental cells. Arrow indicates the band of Cx43. Lane 1: total protein of cell lysates; Lane 2: supernatants of total protein incubated with rabbit IgG and protein A/G PLUS-Agarose; Lane 3: precipitations of total protein incubated with rabbit IgG and protein A/G PLUS-Agarose; Lane 4: anti-Akt antibody is used for A1, A2, B1, B2, C1, C2, D1, D2, and anti-Cx43 antibody is used for A3, A4, B3, B4, C3, C4, D3, D4; Lane 5: supernatants of lane 2 + antibody used in lane 4 + protein A/G PLUS-Agarose; Lane 6:

resuspended immunoprecipitates. Molecular weight of Akt and IgG heavy chain is similar, so they are hardly to be discriminated. (A1, 3) Non-treated HCT116 cells. (A2, 4) Non-treated CT26 cells. (B1, 3) Resveratrol-treated HCT116 cells. (B2, 4) Resveratrol-treated CT26 cells. (C1, 3) Cetuximab-treated HCT116 cells. (C2, 4) Cetuximab-treated CT26 cells. (D1, 3) Cetuximab + Resveratrol-treated HCT116 cells. (D2, 4) Cetuximab + Resveratrol-treated CT26 cells.

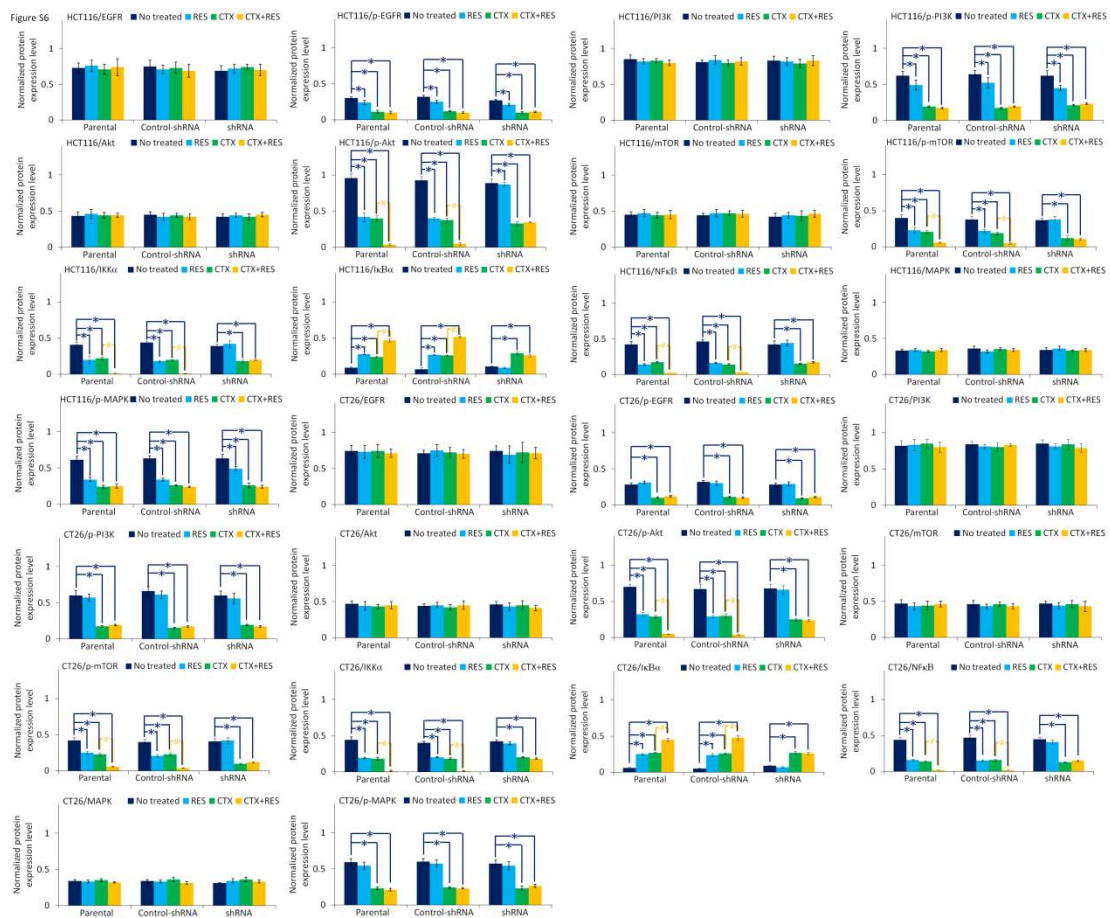

**Figure S6.** Bar diagrams of densitometric analysis of western blot analysis in Figure 4.

“RES” represents resveratrol treatment, “CTX” represents cetuximab treatment, “CTX+RES” represent combination treatment. Groups “CTX”, “RES”, and “CTX+RES” were compared with group “No treated” using one-way ANOVA. Blue \* $P < 0.05$  represents a significant difference. Group “CTX+RES” was compared with





Figure S7C

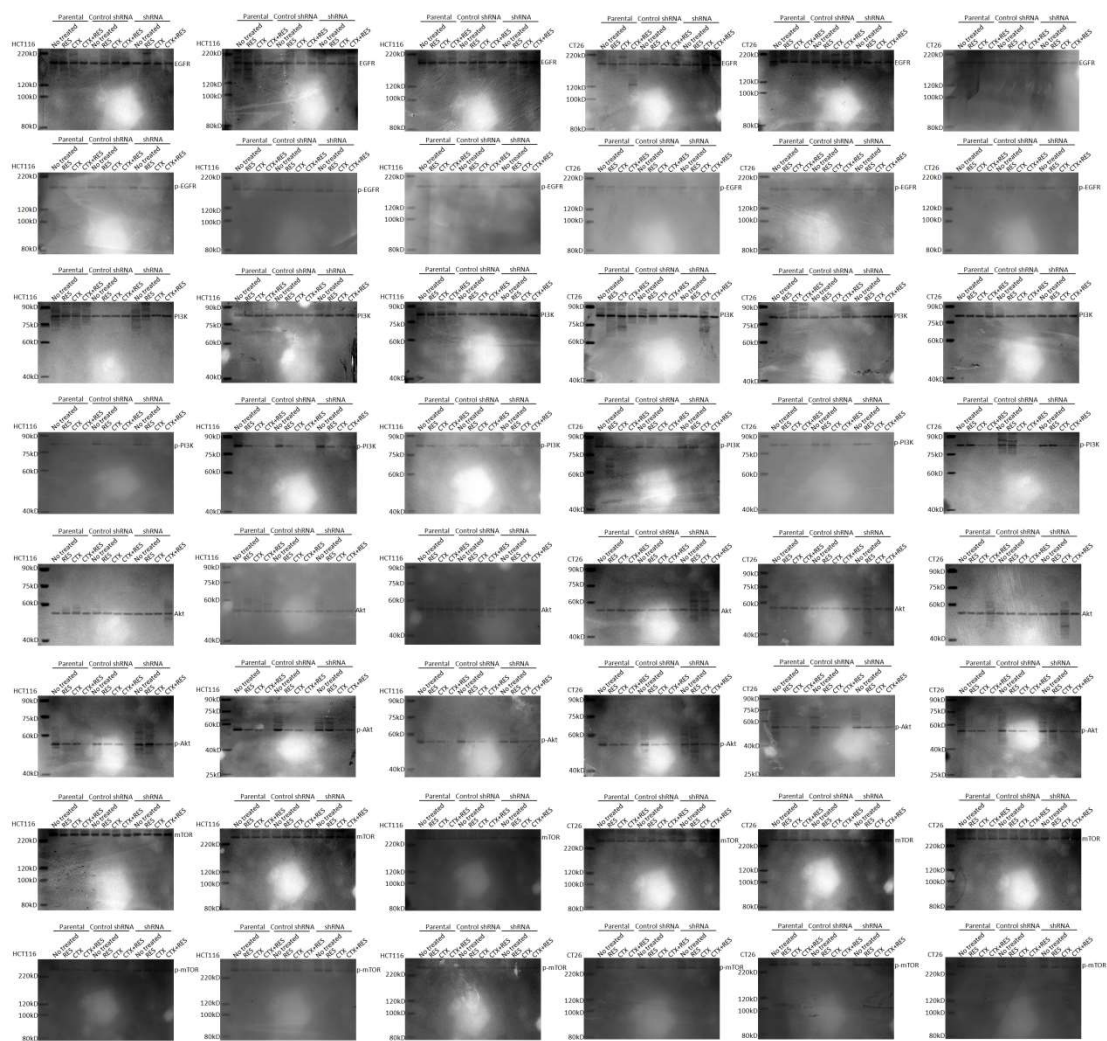

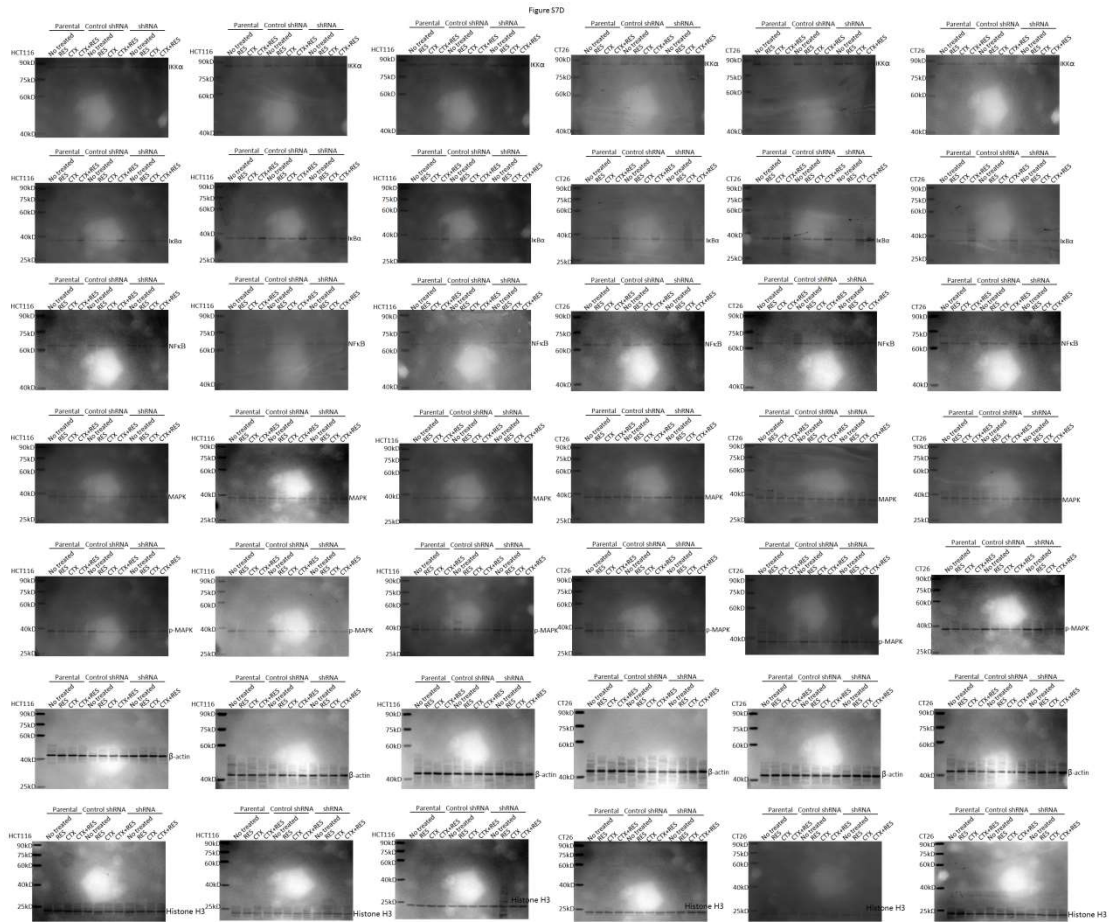

**Figure S7.** Full length blots of western blot results. “CTX” represents cetuximab treatment, “RES” represents resveratrol treatment.

**Table S1.** The raw data used for Calcsyn analysis

| CTX( $\mu$ g/mL)                 | OD490 | OD490 | OD490 | RES( $\mu$ g/mL) | OD490 | OD490 | OD490 | CTX+RES | OD490 | OD490 | OD490 |
|----------------------------------|-------|-------|-------|------------------|-------|-------|-------|---------|-------|-------|-------|
| <b>High HCT116</b>               |       |       |       |                  |       |       |       |         |       |       |       |
| 0                                | 799   | 812   | 786   | 0                | 781   | 796   | 803   |         | 788   | 806   | 805   |
| 0.2                              | 789   | 805   | 779   | 0.1              | 751   | 771   | 779   |         | 758   | 778   | 769   |
| 1                                | 787   | 807   | 781   | 0.5              | 702   | 728   | 739   |         | 707   | 730   | 695   |
| 2                                | 770   | 788   | 782   | 1                | 648   | 679   | 699   |         | 649   | 651   | 623   |
| 4                                | 751   | 781   | 774   | 2                | 606   | 659   | 680   |         | 539   | 577   | 477   |
| 10                               | 702   | 768   | 727   | 5                | 556   | 606   | 626   |         | 458   | 468   | 417   |
| 20                               | 649   | 729   | 683   | 10               | 448   | 495   | 502   |         | 353   | 397   | 309   |
| 40                               | 475   | 547   | 515   | 20               | 246   | 326   | 363   |         | 231   | 265   | 166   |
| 100                              | 269   | 330   | 352   | 50               | 85    | 133   | 164   |         | 139   | 123   | 70    |
| <b>High HCT116-control-shRNA</b> |       |       |       |                  |       |       |       |         |       |       |       |
| 0                                | 800   | 793   | 790   | 0                | 787   | 804   | 778   |         | 789   | 785   | 803   |
| 0.2                              | 790   | 787   | 783   | 0.1              | 764   | 779   | 759   |         | 760   | 757   | 774   |
| 1                                | 794   | 785   | 782   | 0.5              | 715   | 742   | 718   |         | 690   | 701   | 702   |
| 2                                | 773   | 770   | 773   | 1                | 640   | 690   | 644   |         | 634   | 609   | 644   |
| 4                                | 760   | 769   | 765   | 2                | 611   | 622   | 612   |         | 502   | 509   | 565   |
| 10                               | 715   | 732   | 733   | 5                | 554   | 570   | 547   |         | 414   | 404   | 423   |
| 20                               | 672   | 637   | 630   | 10               | 447   | 474   | 447   |         | 336   | 328   | 317   |
| 40                               | 481   | 446   | 451   | 20               | 291   | 294   | 293   |         | 198   | 235   | 240   |
| 100                              | 340   | 383   | 353   | 50               | 186   | 168   | 179   |         | 100   | 122   | 113   |
| <b>High HCT116-shRNA</b>         |       |       |       |                  |       |       |       |         |       |       |       |
| 0                                | 804   | 784   | 799   | 0                | 789   | 798   | 792   |         | 800   | 809   | 792   |
| 0.2                              | 794   | 780   | 795   | 0.1              | 759   | 770   | 767   |         | 777   | 787   | 761   |
| 1                                | 793   | 778   | 793   | 0.5              | 703   | 736   | 724   |         | 709   | 731   | 734   |
| 2                                | 773   | 762   | 778   | 1                | 655   | 689   | 680   |         | 661   | 667   | 688   |
| 4                                | 766   | 759   | 767   | 2                | 571   | 677   | 662   |         | 601   | 597   | 611   |
| 10                               | 724   | 732   | 737   | 5                | 539   | 623   | 613   |         | 538   | 546   | 426   |
| 20                               | 654   | 672   | 702   | 10               | 434   | 501   | 476   |         | 387   | 385   | 313   |
| 40                               | 473   | 497   | 509   | 20               | 258   | 356   | 319   |         | 298   | 312   | 243   |
| 100                              | 262   | 327   | 315   | 50               | 79    | 154   | 163   |         | 173   | 189   | 96    |
| <b>High CT26</b>                 |       |       |       |                  |       |       |       |         |       |       |       |
| 0                                | 765   | 758   | 753   | 0                | 768   | 766   | 755   |         | 754   | 768   | 756   |
| 0.2                              | 755   | 752   | 749   | 0.1              | 735   | 737   | 726   |         | 717   | 731   | 712   |
| 1                                | 751   | 751   | 746   | 0.5              | 669   | 676   | 665   |         | 642   | 659   | 607   |
| 2                                | 722   | 726   | 721   | 1                | 592   | 631   | 625   |         | 579   | 589   | 551   |
| 4                                | 677   | 706   | 710   | 2                | 518   | 558   | 556   |         | 511   | 508   | 426   |
| 10                               | 658   | 662   | 664   | 5                | 372   | 405   | 403   |         | 340   | 356   | 281   |
| 20                               | 597   | 624   | 634   | 10               | 258   | 295   | 301   |         | 265   | 279   | 142   |
| 40                               | 437   | 464   | 464   | 20               | 170   | 297   | 303   |         | 76    | 224   | 97    |
| 100                              | 205   | 287   | 262   | 50               | 6     | 140   | 163   |         | 25    | 182   | 32    |
| <b>High CT26-control-shRNA</b>   |       |       |       |                  |       |       |       |         |       |       |       |
| 0                                | 768   | 753   | 762   | 0                | 756   | 766   | 796   |         | 751   | 758   | 758   |
| 0.2                              | 761   | 748   | 758   | 0.1              | 721   | 736   | 763   |         | 719   | 715   | 698   |
| 1                                | 755   | 746   | 753   | 0.5              | 648   | 693   | 709   |         | 630   | 626   | 638   |
| 2                                | 730   | 717   | 730   | 1                | 585   | 610   | 663   |         | 547   | 563   | 538   |
| 4                                | 698   | 695   | 703   | 2                | 527   | 539   | 573   |         | 471   | 478   | 467   |
| 10                               | 676   | 654   | 666   | 5                | 308   | 447   | 476   |         | 315   | 336   | 302   |
| 20                               | 613   | 621   | 635   | 10               | 250   | 342   | 296   |         | 253   | 218   | 171   |
| 40                               | 446   | 478   | 440   | 20               | 193   | 285   | 282   |         | 103   | 125   | 135   |
| 100                              | 195   | 277   | 303   | 50               | 56    | 94    | 139   |         | 96    | 56    | 45    |

Continued

**Table S1. Continued**

| CTX( $\mu$ g/mL)                | OD490 | OD490 | OD490 | RES( $\mu$ g/mL) | OD490 | OD490 | OD490 | CTX+RES | OD490 | OD490 | OD490 |
|---------------------------------|-------|-------|-------|------------------|-------|-------|-------|---------|-------|-------|-------|
| <b>High CT26-shRNA</b>          |       |       |       |                  |       |       |       |         |       |       |       |
| 0                               | 758   | 774   | 760   | 0                | 760   | 753   | 744   |         | 756   | 759   | 755   |
| 0.2                             | 752   | 770   | 755   | 0.1              | 736   | 731   | 723   |         | 737   | 740   | 731   |
| 1                               | 750   | 767   | 753   | 0.5              | 703   | 692   | 687   |         | 698   | 685   | 667   |
| 2                               | 728   | 742   | 725   | 1                | 631   | 651   | 644   |         | 656   | 638   | 619   |
| 4                               | 705   | 713   | 701   | 2                | 620   | 576   | 577   |         | 586   | 566   | 530   |
| 10                              | 680   | 701   | 649   | 5                | 604   | 515   | 544   |         | 464   | 488   | 444   |
| 20                              | 613   | 653   | 642   | 10               | 485   | 424   | 420   |         | 406   | 408   | 274   |
| 40                              | 478   | 494   | 446   | 20               | 332   | 266   | 270   |         | 276   | 283   | 219   |
| 100                             | 306   | 239   | 247   | 50               | 208   | 67    | 43    |         | 167   | 155   | 78    |
| <b>Low HCT116</b>               |       |       |       |                  |       |       |       |         |       |       |       |
| 0                               | 135   | 128   | 133   | 0                | 146   | 135   | 140   |         | 134   | 130   | 134   |
| 0.2                             | 133   | 127   | 132   | 0.1              | 142   | 131   | 134   |         | 128   | 124   | 130   |
| 1                               | 133   | 126   | 132   | 0.5              | 134   | 122   | 126   |         | 119   | 111   | 114   |
| 2                               | 131   | 125   | 131   | 1                | 122   | 115   | 118   |         | 105   | 101   | 111   |
| 4                               | 130   | 122   | 129   | 2                | 118   | 112   | 112   |         | 89    | 90    | 92    |
| 10                              | 123   | 116   | 123   | 5                | 113   | 96    | 108   |         | 77    | 75    | 74    |
| 20                              | 117   | 109   | 112   | 10               | 83    | 81    | 79    |         | 54    | 62    | 54    |
| 40                              | 90    | 79    | 82    | 20               | 50    | 47    | 50    |         | 40    | 33    | 31    |
| 100                             | 56    | 48    | 44    | 50               | 23    | 14    | 20    |         | 21    | 22    | 14    |
| <b>Low HCT116-control-shRNA</b> |       |       |       |                  |       |       |       |         |       |       |       |
| 0                               | 131   | 125   | 136   | 0                | 126   | 128   | 128   |         | 122   | 119   | 119   |
| 0.2                             | 129   | 124   | 135   | 0.1              | 121   | 124   | 124   |         | 118   | 115   | 114   |
| 1                               | 129   | 123   | 134   | 0.5              | 113   | 117   | 117   |         | 109   | 106   | 99    |
| 2                               | 127   | 121   | 131   | 1                | 101   | 108   | 109   |         | 99    | 97    | 87    |
| 4                               | 126   | 119   | 130   | 2                | 93    | 102   | 102   |         | 83    | 82    | 74    |
| 10                              | 119   | 112   | 125   | 5                | 83    | 92    | 91    |         | 67    | 65    | 56    |
| 20                              | 107   | 102   | 110   | 10               | 65    | 75    | 75    |         | 54    | 50    | 45    |
| 40                              | 83    | 67    | 74    | 20               | 39    | 50    | 53    |         | 36    | 35    | 30    |
| 100                             | 54    | 59    | 65    | 50               | 18    | 33    | 34    |         | 19    | 22    | 8     |
| <b>Low HCT116-shRNA</b>         |       |       |       |                  |       |       |       |         |       |       |       |
| 0                               | 133   | 130   | 122   | 0                | 129   | 137   | 141   |         | 136   | 135   | 131   |
| 0.2                             | 131   | 129   | 121   | 0.1              | 125   | 130   | 136   |         | 130   | 130   | 128   |
| 1                               | 131   | 129   | 120   | 0.5              | 118   | 121   | 129   |         | 122   | 121   | 120   |
| 2                               | 127   | 127   | 117   | 1                | 113   | 115   | 123   |         | 112   | 111   | 114   |
| 4                               | 127   | 126   | 116   | 2                | 107   | 104   | 116   |         | 98    | 99    | 104   |
| 10                              | 120   | 121   | 111   | 5                | 100   | 96    | 109   |         | 82    | 82    | 87    |
| 20                              | 110   | 114   | 99    | 10               | 81    | 74    | 87    |         | 57    | 56    | 65    |
| 40                              | 80    | 86    | 73    | 20               | 57    | 47    | 57    |         | 47    | 45    | 51    |
| 100                             | 47    | 58    | 43    | 50               | 26    | 15    | 27    |         | 22    | 22    | 34    |
| <b>Low CT26</b>                 |       |       |       |                  |       |       |       |         |       |       |       |
| 0                               | 125   | 127   | 134   | 0                | 119   | 120   | 125   |         | 134   | 121   | 133   |
| 0.2                             | 124   | 125   | 132   | 0.1              | 115   | 114   | 119   |         | 126   | 114   | 127   |
| 1                               | 124   | 125   | 132   | 0.5              | 107   | 103   | 108   |         | 110   | 100   | 113   |
| 2                               | 120   | 120   | 127   | 1                | 101   | 92    | 98    |         | 98    | 89    | 106   |
| 4                               | 117   | 115   | 121   | 2                | 89    | 83    | 87    |         | 80    | 73    | 91    |
| 10                              | 111   | 109   | 115   | 5                | 66    | 60    | 63    |         | 53    | 49    | 61    |
| 20                              | 105   | 102   | 106   | 10               | 50    | 42    | 44    |         | 37    | 32    | 46    |
| 40                              | 79    | 71    | 77    | 20               | 47    | 36    | 38    |         | 15    | 18    | 35    |
| 100                             | 53    | 31    | 41    | 50               | 24    | 13    | 15    |         | 11    | 9     | 23    |

Continued



**Table S1. Continued**

| CTX( $\mu$ g/mL)              | OD490 | OD490 | OD490 | RES( $\mu$ g/mL) | OD490 | OD490 | OD490 | CTX+RES | OD490 | OD490 | OD490 |
|-------------------------------|-------|-------|-------|------------------|-------|-------|-------|---------|-------|-------|-------|
| <b>Low CT26-control-shRNA</b> |       |       |       |                  |       |       |       |         |       |       |       |
| 0                             | 115   | 120   | 118   | 0                | 119   | 114   | 125   |         | 121   | 117   | 128   |
| 0.2                           | 113   | 119   | 117   | 0.1              | 111   | 109   | 120   |         | 115   | 107   | 122   |
| 1                             | 112   | 119   | 117   | 0.5              | 101   | 102   | 113   |         | 103   | 90    | 108   |
| 2                             | 109   | 114   | 113   | 1                | 90    | 94    | 105   |         | 89    | 76    | 96    |
| 4                             | 103   | 111   | 109   | 2                | 76    | 83    | 91    |         | 80    | 62    | 82    |
| 10                            | 96    | 107   | 103   | 5                | 59    | 66    | 69    |         | 54    | 42    | 59    |
| 20                            | 91    | 102   | 100   | 10               | 38    | 46    | 50    |         | 35    | 27    | 37    |
| 40                            | 61    | 74    | 75    | 20               | 29    | 38    | 41    |         | 22    | 14    | 28    |
| 100                           | 33    | 46    | 45    | 50               | 8     | 18    | 19    |         | 16    | 3     | 17    |
| <b>Low CT26-control-shRNA</b> |       |       |       |                  |       |       |       |         |       |       |       |
| 0                             | 124   | 109   | 128   | 0                | 115   | 120   | 125   |         | 117   | 119   | 118   |
| 0.2                           | 122   | 108   | 127   | 0.1              | 110   | 117   | 122   |         | 113   | 116   | 113   |
| 1                             | 122   | 108   | 127   | 0.5              | 104   | 112   | 117   |         | 104   | 111   | 105   |
| 2                             | 117   | 104   | 122   | 1                | 95    | 103   | 110   |         | 97    | 104   | 97    |
| 4                             | 112   | 101   | 119   | 2                | 83    | 96    | 100   |         | 83    | 94    | 85    |
| 10                            | 108   | 97    | 116   | 5                | 76    | 89    | 94    |         | 69    | 80    | 71    |
| 20                            | 99    | 93    | 111   | 10               | 59    | 74    | 75    |         | 53    | 62    | 54    |
| 40                            | 68    | 69    | 85    | 20               | 37    | 49    | 52    |         | 38    | 47    | 38    |
| 100                           | 33    | 38    | 48    | 50               | 10    | 19    | 21    |         | 16    | 31    | 15    |
| <b>HCT116-empty-vector</b>    |       |       |       |                  |       |       |       |         |       |       |       |
| 0                             | 781   | 793   | 776   | 0                | 802   | 785   | 784   |         | 781   | 782   | 775   |
| 0.2                           | 771   | 789   | 770   | 0.1              | 751   | 763   | 762   |         | 754   | 757   | 747   |
| 1                             | 773   | 781   | 772   | 0.5              | 709   | 720   | 734   |         | 709   | 699   | 676   |
| 2                             | 758   | 779   | 771   | 1                | 670   | 679   | 689   |         | 663   | 627   | 613   |
| 4                             | 739   | 756   | 762   | 2                | 612   | 654   | 663   |         | 518   | 576   | 468   |
| 10                            | 689   | 754   | 720   | 5                | 567   | 570   | 628   |         | 410   | 467   | 406   |
| 20                            | 627   | 697   | 664   | 10               | 441   | 474   | 502   |         | 356   | 370   | 285   |
| 40                            | 470   | 528   | 498   | 20               | 238   | 341   | 327   |         | 247   | 271   | 151   |
| 100                           | 274   | 337   | 339   | 50               | 79    | 151   | 170   |         | 136   | 108   | 79    |
| <b>HCT116-Cx43-vector</b>     |       |       |       |                  |       |       |       |         |       |       |       |
| 0                             | 779   | 792   | 785   | 0                | 784   | 784   | 788   |         | 790   | 771   | 798   |
| 0.2                           | 709   | 749   | 751   | 0.1              | 743   | 765   | 762   |         | 673   | 721   | 739   |
| 1                             | 666   | 682   | 693   | 0.5              | 685   | 725   | 743   |         | 587   | 626   | 644   |
| 2                             | 602   | 630   | 577   | 1                | 636   | 693   | 697   |         | 422   | 494   | 522   |
| 4                             | 437   | 479   | 522   | 2                | 595   | 632   | 660   |         | 349   | 318   | 389   |
| 10                            | 331   | 319   | 338   | 5                | 523   | 544   | 637   |         | 218   | 198   | 234   |
| 20                            | 218   | 210   | 233   | 10               | 410   | 453   | 491   |         | 146   | 82    | 117   |
| 40                            | 120   | 120   | 115   | 20               | 201   | 329   | 320   |         | 82    | 64    | 48    |
| 100                           | 49    | 45    | 57    | 50               | 98    | 170   | 193   |         | 52    | 10    | 21    |
| <b>CT26-empty-vector</b>      |       |       |       |                  |       |       |       |         |       |       |       |
| 0                             | 784   | 772   | 789   | 0                | 792   | 785   | 796   |         | 801   | 781   | 776   |
| 0.2                           | 773   | 768   | 783   | 0.1              | 755   | 752   | 770   |         | 765   | 746   | 728   |
| 1                             | 768   | 766   | 785   | 0.5              | 705   | 688   | 710   |         | 692   | 659   | 640   |
| 2                             | 751   | 738   | 752   | 1                | 605   | 660   | 647   |         | 625   | 605   | 577   |
| 4                             | 684   | 718   | 748   | 2                | 511   | 579   | 602   |         | 523   | 545   | 421   |
| 10                            | 669   | 666   | 688   | 5                | 346   | 423   | 430   |         | 358   | 357   | 262   |
| 20                            | 608   | 654   | 660   | 10               | 252   | 333   | 360   |         | 292   | 306   | 150   |
| 40                            | 430   | 466   | 463   | 20               | 163   | 284   | 297   |         | 91    | 238   | 104   |
| 100                           | 191   | 275   | 317   | 50               | 27    | 149   | 183   |         | 50    | 176   | 40    |

Continued

**Table S1. Continued**

| CTX( $\mu$ g/mL)                      | OD490 | OD490 | OD490 | RES( $\mu$ g/mL) | OD490 | OD490 | OD490 | CTX+RES | OD490 | OD490 | OD490 |
|---------------------------------------|-------|-------|-------|------------------|-------|-------|-------|---------|-------|-------|-------|
| <b>CT26-Cx43-vector</b>               |       |       |       |                  |       |       |       |         |       |       |       |
| 0                                     | 778   | 790   | 789   | 0                | 792   | 803   | 780   |         | 790   | 792   | 799   |
| 0.2                                   | 655   | 689   | 661   | 0.1              | 751   | 769   | 753   |         | 595   | 618   | 640   |
| 1                                     | 566   | 627   | 597   | 0.5              | 700   | 707   | 703   |         | 432   | 540   | 539   |
| 2                                     | 403   | 528   | 537   | 1                | 615   | 685   | 643   |         | 265   | 399   | 402   |
| 4                                     | 269   | 363   | 326   | 2                | 517   | 599   | 603   |         | 188   | 273   | 329   |
| 10                                    | 143   | 309   | 224   | 5                | 355   | 443   | 437   |         | 106   | 187   | 187   |
| 20                                    | 88    | 155   | 163   | 10               | 243   | 344   | 368   |         | 66    | 121   | 105   |
| 40                                    | 59    | 82    | 116   | 20               | 171   | 305   | 308   |         | 44    | 77    | 59    |
| 100                                   | 27    | 26    | 54    | 50               | 47    | 163   | 206   |         | 37    | 26    | 18    |
| <b>Inhibitor HCT116</b>               |       |       |       |                  |       |       |       |         |       |       |       |
| 0                                     | 802   | 793   | 778   | 0                | 785   | 781   | 790   |         | 792   | 807   | 776   |
| 0.2                                   | 797   | 787   | 770   | 0.1              | 764   | 758   | 769   |         | 756   | 772   | 741   |
| 1                                     | 795   | 784   | 771   | 0.5              | 726   | 717   | 716   |         | 710   | 689   | 670   |
| 2                                     | 794   | 772   | 746   | 1                | 678   | 675   | 668   |         | 632   | 684   | 601   |
| 4                                     | 788   | 761   | 729   | 2                | 654   | 631   | 581   |         | 557   | 535   | 460   |
| 10                                    | 745   | 747   | 677   | 5                | 625   | 571   | 543   |         | 472   | 480   | 402   |
| 20                                    | 710   | 704   | 648   | 10               | 474   | 504   | 470   |         | 407   | 328   | 297   |
| 40                                    | 507   | 524   | 447   | 20               | 339   | 303   | 242   |         | 265   | 280   | 160   |
| 100                                   | 345   | 299   | 275   | 50               | 144   | 121   | 98    |         | 139   | 129   | 68    |
| <b>Inhibitor HCT116-control-shRNA</b> |       |       |       |                  |       |       |       |         |       |       |       |
| 0                                     | 772   | 796   | 803   | 0                | 801   | 809   | 790   |         | 793   | 785   | 798   |
| 0.2                                   | 767   | 788   | 797   | 0.1              | 776   | 780   | 764   |         | 767   | 755   | 770   |
| 1                                     | 768   | 789   | 793   | 0.5              | 724   | 758   | 722   |         | 716   | 693   | 695   |
| 2                                     | 755   | 776   | 774   | 1                | 684   | 715   | 652   |         | 629   | 647   | 628   |
| 4                                     | 744   | 770   | 758   | 2                | 639   | 612   | 594   |         | 518   | 536   | 529   |
| 10                                    | 717   | 741   | 704   | 5                | 583   | 585   | 580   |         | 438   | 434   | 405   |
| 20                                    | 589   | 631   | 655   | 10               | 475   | 481   | 442   |         | 348   | 295   | 327   |
| 40                                    | 428   | 433   | 509   | 20               | 269   | 306   | 274   |         | 273   | 203   | 218   |
| 100                                   | 338   | 379   | 327   | 50               | 174   | 173   | 199   |         | 93    | 144   | 85    |
| <b>Inhibitor HCT116-shRNA</b>         |       |       |       |                  |       |       |       |         |       |       |       |
| 0                                     | 791   | 797   | 805   | 0                | 788   | 802   | 780   |         | 805   | 778   | 788   |
| 0.2                                   | 787   | 789   | 797   | 0.1              | 767   | 770   | 755   |         | 781   | 753   | 763   |
| 1                                     | 787   | 792   | 793   | 0.5              | 724   | 745   | 690   |         | 734   | 677   | 728   |
| 2                                     | 769   | 769   | 776   | 1                | 670   | 702   | 666   |         | 677   | 625   | 692   |
| 4                                     | 754   | 768   | 765   | 2                | 667   | 688   | 546   |         | 606   | 583   | 625   |
| 10                                    | 728   | 738   | 722   | 5                | 592   | 636   | 529   |         | 533   | 535   | 406   |
| 20                                    | 678   | 676   | 649   | 10               | 491   | 483   | 439   |         | 357   | 383   | 319   |
| 40                                    | 526   | 484   | 462   | 20               | 345   | 377   | 261   |         | 302   | 304   | 257   |
| 100                                   | 326   | 318   | 269   | 50               | 144   | 166   | 99    |         | 175   | 161   | 116   |
| <b>Inhibitor CT26</b>                 |       |       |       |                  |       |       |       |         |       |       |       |
| 0                                     | 770   | 752   | 760   | 0                | 752   | 763   | 759   |         | 755   | 756   | 747   |
| 0.2                                   | 764   | 748   | 751   | 0.1              | 726   | 734   | 723   |         | 722   | 717   | 707   |
| 1                                     | 765   | 744   | 747   | 0.5              | 660   | 670   | 670   |         | 640   | 650   | 618   |
| 2                                     | 732   | 722   | 720   | 1                | 614   | 637   | 591   |         | 570   | 585   | 549   |
| 4                                     | 729   | 701   | 674   | 2                | 548   | 538   | 522   |         | 516   | 526   | 417   |
| 10                                    | 682   | 662   | 668   | 5                | 398   | 424   | 345   |         | 357   | 367   | 297   |
| 20                                    | 644   | 633   | 608   | 10               | 306   | 265   | 257   |         | 298   | 283   | 147   |
| 40                                    | 468   | 457   | 428   | 20               | 268   | 258   | 157   |         | 231   | 87    | 100   |
| 100                                   | 256   | 295   | 214   | 50               | 181   | 155   | 72    |         | 185   | 21    | 28    |

Continued

**Table S1. Continued**

| CTX( $\mu$ g/mL)                    | OD490 | OD490 | OD490 | RES( $\mu$ g/mL) | OD490 | OD490 | OD490 | CTX+RES | OD490 | OD490 | OD490 |
|-------------------------------------|-------|-------|-------|------------------|-------|-------|-------|---------|-------|-------|-------|
| <b>Inhibitor CT26-control-shRNA</b> |       |       |       |                  |       |       |       |         |       |       |       |
| 0                                   | 752   | 746   | 752   | 0                | 743   | 750   | 766   |         | 742   | 739   | 751   |
| 0.2                                 | 747   | 742   | 745   | 0.1              | 709   | 723   | 733   |         | 707   | 684   | 707   |
| 1                                   | 744   | 737   | 741   | 0.5              | 659   | 684   | 662   |         | 629   | 631   | 603   |
| 2                                   | 722   | 713   | 717   | 1                | 610   | 625   | 589   |         | 548   | 547   | 568   |
| 4                                   | 696   | 685   | 675   | 2                | 525   | 531   | 523   |         | 478   | 461   | 470   |
| 10                                  | 654   | 657   | 657   | 5                | 426   | 422   | 301   |         | 335   | 308   | 351   |
| 20                                  | 622   | 624   | 579   | 10               | 268   | 326   | 273   |         | 258   | 186   | 218   |
| 40                                  | 447   | 464   | 430   | 20               | 236   | 253   | 210   |         | 121   | 128   | 105   |
| 100                                 | 286   | 259   | 207   | 50               | 146   | 82    | 64    |         | 83    | 34    | 74    |
| <b>Inhibitor CT26-shRNA</b>         |       |       |       |                  |       |       |       |         |       |       |       |
| 0                                   | 752   | 755   | 742   | 0                | 757   | 761   | 739   |         | 742   | 744   | 750   |
| 0.2                                 | 746   | 751   | 738   | 0.1              | 735   | 735   | 713   |         | 721   | 727   | 717   |
| 1                                   | 747   | 749   | 735   | 0.5              | 701   | 700   | 682   |         | 667   | 702   | 647   |
| 2                                   | 719   | 718   | 711   | 1                | 659   | 649   | 625   |         | 635   | 655   | 596   |
| 4                                   | 691   | 695   | 693   | 2                | 593   | 591   | 612   |         | 552   | 583   | 517   |
| 10                                  | 637   | 677   | 655   | 5                | 564   | 517   | 579   |         | 473   | 435   | 424   |
| 20                                  | 633   | 647   | 598   | 10               | 439   | 440   | 458   |         | 393   | 383   | 285   |
| 40                                  | 453   | 483   | 461   | 20               | 266   | 274   | 315   |         | 278   | 270   | 232   |
| 100                                 | 239   | 224   | 286   | 50               | 55    | 85    | 215   |         | 135   | 150   | 108   |

The concentration of “CTX+RES” is the same to the concentration of CTX and RES in the same line.

**Table S2.** The statistical difference of growth inhibition between parental and Cx43-shRNA transfected cells in different concentration calculated by one-way ANOVA, \*P < 0.05.

|                  | CTX 0.2         | CTX 1         | CTX 2       | CTX 4       | CTX 10       | CTX 20        | CTX 40        | CTX 100        |
|------------------|-----------------|---------------|-------------|-------------|--------------|---------------|---------------|----------------|
| High HCT116      |                 |               | *           |             |              |               |               |                |
| High CT26        |                 |               |             |             |              |               |               |                |
| Low HCT116       |                 | *             |             |             |              |               |               |                |
| Low CT26         |                 |               |             |             |              |               |               |                |
| Inhibitor HCT116 |                 |               | *           |             |              |               |               |                |
| Inhibitor CT26   | *               | *             |             |             |              |               |               |                |
|                  | RES 0.1         | RES 0.5       | RES 1       | RES 2       | RES 5        | RES 10        | RES 20        | RES 50         |
| High HCT116      |                 |               |             |             |              |               |               |                |
| High CT26        | *               | *             | *           | *           | *            | *             |               |                |
| Low HCT116       |                 |               |             |             |              |               | *             |                |
| Low CT26         | *               | *             |             |             | *            | *             |               |                |
| Inhibitor HCT116 |                 |               |             |             |              |               |               |                |
| Inhibitor CT26   |                 | *             | *           | *           | *            | *             | *             |                |
|                  | CTX 0.2+RES 0.1 | CTX 1+RES 0.5 | CTX 2+RES 1 | CTX 4+RES 2 | CTX 10+RES 5 | CTX 20+RES 10 | CTX 40+RES 20 | CTX 100+RES 50 |
| High HCT116      | *               |               | *           | *           | *            |               | *             | *              |
| High CT26        | *               | *             | *           | *           | *            | *             | *             |                |
| Low HCT116       | *               | *             | *           | *           | *            |               | *             |                |
| Low CT26         | *               | *             | *           | *           | *            | *             |               |                |
| Inhibitor HCT116 | *               | *             | *           | *           | *            |               | *             | *              |
| Inhibitor CT26   | *               | *             | *           | *           | *            | *             | *             |                |

CTX represents cetuximab, RES represents resveratrol, the numbers represents  $\mu$ g/mL concentration.

**Doc.1.** The data generated by Calcsyn analysis.

Title:

Date:

Investigator:

Filename: High-HCT116-CTX+RES.csn

---

Summary table

Drug Combination Index Values at

|                     | ED50    | ED75 | ED90 | Dm      | m         | r        |         |
|---------------------|---------|------|------|---------|-----------|----------|---------|
| cetuximab           | N/A     | N/A  | N/A  | N/A     | 112.22347 | 0.87902  | 0.96080 |
| (Not a combination) |         |      |      |         |           |          |         |
| resveratrol         | N/A     | N/A  | N/A  | N/A     | 11.62714  | 0.76427  | 0.97993 |
| (Not a combination) |         |      |      |         |           |          |         |
| combination         | 0.62042 |      |      | 0.60360 | 0.59054   | 11.95107 | 0.79890 |
|                     | 0.99719 |      |      |         |           |          |         |
| (2:1)               |         |      |      |         |           |          |         |

---

Drug: cetuximab

Data points entered:

cetuximab Fraction affected

µg/mL

0.2 0.0093

1 0.0083

2 0.0233

4 0.0370

10 0.0830

20 0.1397

40 0.3583



100 0.6023

Median-effect parameters:

cetuximab

µg/mL

Dm: 112.22347

lower 95%: 49.69084

upper 95%: 253.44925

m: 0.87902 +/- 0.103555

y-int: -1.8021 +/- 0.116935

r: 0.96080

CCSI: -0.67605

---

Drug: resveratrol

Data points entered:

resveratrol    Fraction affected

µg/mL

0.1    0.0327

0.5    0.0833

1    0.1483

2    0.1823

5    0.2483

10    0.3923

20    0.6073

50    0.8393

Median-effect parameters:

resveratrol

µg/mL

Dm: 11.62714

lower 95%: 7.91012

upper 95%: 17.09083

m: 0.76427 +/- 0.063477

y-int: -0.81431 +/- 0.060424

r: 0.97993

CCSI: -0.48573

---

Drug: combination

Combination: cetuximab    resveratrol

Ratio: 2:1

Data points entered:

| cetuximab<br>(µg/mL) | resveratrol<br>(µg/mL) | Fraction affected |
|----------------------|------------------------|-------------------|
| 0.2                  | 0.1                    | 0.0383            |
| 1                    | 0.5                    | 0.1107            |
| 2                    | 1                      | 0.1977            |
| 4                    | 2                      | 0.3350            |
| 10                   | 5                      | 0.4393            |
| 20                   | 10                     | 0.5583            |
| 40                   | 20                     | 0.7233            |
| 100                  | 50                     | 0.8607            |

Median-effect parameters:

cetuximab    resveratrol

|            |                      |                      |
|------------|----------------------|----------------------|
|            | ( $\mu\text{g/mL}$ ) | ( $\mu\text{g/mL}$ ) |
| Dm:        | 11.95107             | 5.97553              |
| lower 95%: | 10.56687             | 5.28344              |
| upper 95%: | 13.51659             | 6.75829              |

m: 0.79890 +/- 0.024502  
y-int: -0.86074 +/- 0.027668  
r: 0.99719  
CCSI: -0.67605

---

Title:

Date:

Investigator:

Filename: High-HCT116-control-shRNA-CTX+RES.csn

---

#### Summary table

Drug Combination Index Values at

|                     | ED50    | ED75 | ED90 | Dm      | m         | r        |         |
|---------------------|---------|------|------|---------|-----------|----------|---------|
| cetuximab           | N/A     | N/A  | N/A  | N/A     | 101.25327 | 0.88763  | 0.96474 |
| (Not a combination) |         |      |      |         |           |          |         |
| resveratrol         | N/A     | N/A  | N/A  | N/A     | 11.49965  | 0.75105  | 0.99428 |
| (Not a combination) |         |      |      |         |           |          |         |
| combination         | 0.60799 |      |      | 0.57787 | 0.55405   | 11.39502 | 0.80409 |
|                     | 0.99856 |      |      |         |           |          |         |

(2:1)

---

Drug: cetuximab

Data points entered:

cetuximab Fraction affected

$\mu\text{g/mL}$

|     |        |
|-----|--------|
| 0.2 | 0.0090 |
| 1   | 0.0083 |
| 2   | 0.0273 |
| 4   | 0.0367 |
| 10  | 0.0847 |
| 20  | 0.1860 |
| 40  | 0.4210 |
| 100 | 0.5480 |

Median-effect parameters:

cetuximab

$\mu\text{g/mL}$

Dm: 101.25327

lower 95%: 47.75686

upper 95%: 214.67544

m: 0.88763 +/- 0.098869

y-int: -1.7801 +/- 0.111644

r: 0.96474

CCSI: -0.67605

---

Drug: resveratrol

Data points entered:

resveratrol    Fraction affected

$\mu\text{g/mL}$

0.1    0.0280

0.5    0.0813

1    0.1660

2 0.2207  
5 0.2943  
10 0.4220  
20 0.6287  
50 0.7743

Median-effect parameters:

resveratrol

µg/mL

Dm: 11.49965

lower 95%: 9.38807

upper 95%: 14.08618

m: 0.75105 +/- 0.032944

y-int: -0.79663 +/- 0.031359

r: 0.99428

CCSI: -0.48573

-----  
Drug: combination

Combination: cetuximab resveratrol

Ratio: 2:1

Data points entered:

| cetuximab | resveratrol | Fraction affected |
|-----------|-------------|-------------------|
| (µg/mL)   | (µg/mL)     |                   |
| 0.2       | 0.1         | 0.0357            |
| 1         | 0.5         | 0.1187            |
| 2         | 1           | 0.2057            |
| 4         | 2           | 0.3367            |



|     |    |        |
|-----|----|--------|
| 10  | 5  | 0.4777 |
| 20  | 10 | 0.5860 |
| 40  | 20 | 0.7163 |
| 100 | 50 | 0.8583 |

Median-effect parameters:

|            | cetuximab<br>( $\mu\text{g/mL}$ ) | resveratrol<br>( $\mu\text{g/mL}$ ) |
|------------|-----------------------------------|-------------------------------------|
| Dm:        | 11.39502                          | 5.69751                             |
| lower 95%: | 10.44239                          | 5.22119                             |
| upper 95%: | 12.43456                          | 6.21728                             |

m: 0.80409 +/- 0.017631

y-int: -0.84969 +/- 0.019909

r: 0.99856

CCSI: -0.67605

---

Title:

Date:

Investigator:

Filename: High-HCT116-shRNA-CTX+RES.csn

---

Summary table

Drug Combination Index Values at

|                     | ED50    | ED75 | ED90 | Dm      | m        | r        |
|---------------------|---------|------|------|---------|----------|----------|
| cetuximab           | N/A     | N/A  | N/A  | N/A     | 96.02317 | 0.91250  |
| (Not a combination) |         |      |      |         |          | 0.97311  |
| resveratrol         | N/A     | N/A  | N/A  | N/A     | 11.39517 | 0.75156  |
| (Not a combination) |         |      |      |         |          | 0.98246  |
| combination         | 0.93164 |      |      | 0.92656 | 0.93258  | 17.15968 |
|                     | 0.99922 |      |      |         |          | 0.78393  |

(2:1)

---

Drug: cetuximab

Data points entered:

cetuximab      Fraction affected

µg/mL

0.2      0.0070

1      0.0090

2      0.0303

4      0.0393

10      0.0807

20      0.1497

40      0.3797

100      0.6200

Median-effect parameters:

    cetuximab

    µg/mL

Dm: 96.02317

lower 95%: 50.44833

upper 95%: 182.77018

m: 0.91250 +/- 0.088177

y-int: -1.8089 +/- 0.099570

r: 0.97311

CCSI: -0.67605

---

Drug: resveratrol

Data points entered:

| resveratrol<br>µg/mL | Fraction affected |
|----------------------|-------------------|
| 0.1                  | 0.0340            |
| 0.5                  | 0.0900            |
| 1                    | 0.1487            |
| 2                    | 0.1970            |
| 5                    | 0.2536            |
| 10                   | 0.4063            |
| 20                   | 0.6073            |
| 50                   | 0.8327            |

Median-effect parameters:

|                      |          |
|----------------------|----------|
| resveratrol<br>µg/mL |          |
| Dm:                  | 11.39517 |
| lower 95%:           | 7.96922  |
| upper 95%:           | 16.29392 |

|        |                       |
|--------|-----------------------|
| m:     | 0.75156 +/- 0.058239  |
| y-int: | -0.79419 +/- 0.055438 |
| r:     | 0.98246               |
| CCSI:  | -0.48573              |

---

Drug: combination

Combination: cetuximab    resveratrol

Ratio: 2:1

Data points entered:

|  | cetuximab                   | resveratrol                 | Fraction affected |
|--|-----------------------------|-----------------------------|-------------------|
|  | ( $\mu\text{g}/\text{mL}$ ) | ( $\mu\text{g}/\text{mL}$ ) |                   |
|  | 0.2                         | 0.1                         | 0.0306            |
|  | 1                           | 0.5                         | 0.0937            |
|  | 2                           | 1                           | 0.1597            |
|  | 4                           | 2                           | 0.2457            |
|  | 10                          | 5                           | 0.3713            |
|  | 20                          | 10                          | 0.5477            |
|  | 40                          | 20                          | 0.6447            |
|  | 100                         | 50                          | 0.8090            |

Median-effect parameters:

|            | cetuximab                   | resveratrol                 |
|------------|-----------------------------|-----------------------------|
|            | ( $\mu\text{g}/\text{mL}$ ) | ( $\mu\text{g}/\text{mL}$ ) |
| Dm:        | 17.15968                    | 8.57984                     |
| lower 95%: | 16.00915                    | 8.00458                     |
| upper 95%: | 18.39290                    | 9.19645                     |

m: 0.78393 +/- 0.012608

y-int: -0.96776 +/- 0.014237

r: 0.99922

CCSI: -0.67605

---

Title:

Date:

Investigator:

Filename: High-CT26-CTX+RES.csn

---

Summary table

Drug Combination Index Values at

|                     | ED50    | ED75 | ED90    | Dm       | m       | r       |  |  |
|---------------------|---------|------|---------|----------|---------|---------|--|--|
| cetuximab           | N/A     | N/A  | N/A     | 69.41670 | 0.89583 | 0.98066 |  |  |
| (Not a combination) |         |      |         |          |         |         |  |  |
| resveratrol         | N/A     | N/A  | N/A     | 5.94773  | 0.79365 | 0.99656 |  |  |
| (Not a combination) |         |      |         |          |         |         |  |  |
| combination         | 0.70713 |      | 0.67955 | 0.65532  | 7.18111 | 0.83244 |  |  |
|                     | 0.99925 |      |         |          |         |         |  |  |
| (2:1)               |         |      |         |          |         |         |  |  |

---

Drug: cetuximab

Data points entered:

cetuximab      Fraction affected

µg/mL

0.2      0.0083

1      0.0120

2      0.0460

4      0.0800

10      0.1273

20      0.1843

40      0.3993

100      0.6680

Median-effect parameters:

cetuximab

µg/mL

Dm: 69.41670

lower 95%: 42.07219

upper 95%: 114.53357



m: 0.89583 +/- 0.072988

y-int: -1.6496 +/- 0.082418

r: 0.98066

CCSI: -0.67605

---

Drug: resveratrol

Data points entered:

resveratrol      Fraction affected

µg/mL

0.1      0.0390

0.5      0.1213

1        0.1920

2        0.2863

5        0.4840

10       0.6263

20       0.6627

50       0.8637

Median-effect parameters:

resveratrol

µg/mL

Dm: 5.94773

lower 95%: 5.19108

upper 95%: 6.81468

m: 0.79365 +/- 0.026927

y-int: -0.61456 +/- 0.025632

r: 0.99656

CCSI: -0.48573

---

Drug: combination

Combination: cetuximab    resveratrol

Ratio: 2:1

Data points entered:

| cetuximab<br>( $\mu\text{g/mL}$ ) | resveratrol<br>( $\mu\text{g/mL}$ ) | Fraction affected |
|-----------------------------------|-------------------------------------|-------------------|
| 0.2                               | 0.1                                 | 0.0510            |
| 1                                 | 0.5                                 | 0.1617            |
| 2                                 | 1                                   | 0.2450            |
| 4                                 | 2                                   | 0.3650            |
| 10                                | 5                                   | 0.5710            |
| 20                                | 10                                  | 0.6983            |
| 40                                | 20                                  | 0.8260            |
| 100                               | 50                                  | 0.8950            |

Median-effect parameters:

|            | cetuximab<br>( $\mu\text{g/mL}$ ) | resveratrol<br>( $\mu\text{g/mL}$ ) |
|------------|-----------------------------------|-------------------------------------|
| Dm:        | 7.18111                           | 3.59055                             |
| lower 95%: | 6.76415                           | 3.38207                             |
| upper 95%: | 7.62378                           | 3.81189                             |

m: 0.83244 +/- 0.013179

y-int: -0.71273 +/- 0.014881

r: 0.99925

CCSI: -0.67605

---

Title:

Date:

Investigator:

Filename: High-CT26-control-shRNA-CTX+RES.csn

---

Summary table

Drug Combination Index Values at

|                     | ED50    | ED75 | ED90 | Dm      | m        | r       |         |  |
|---------------------|---------|------|------|---------|----------|---------|---------|--|
| cetuximab           | N/A     | N/A  | N/A  | N/A     | 68.24735 | 0.91766 | 0.98427 |  |
| (Not a combination) |         |      |      |         |          |         |         |  |
| resveratrol         | N/A     | N/A  | N/A  | N/A     | 5.81648  | 0.79829 | 0.99617 |  |
| (Not a combination) |         |      |      |         |          |         |         |  |
| combination         | 0.64388 |      |      | 0.61987 | 0.59945  | 6.39946 | 0.83860 |  |
|                     | 0.99866 |      |      |         |          |         |         |  |

(2:1)

---

Drug: cetuximab

Data points entered:

cetuximab Fraction affected

µg/mL

0.2 0.0067

1 0.0117

2 0.0457

4 0.0810

10 0.1250

20 0.1807

40 0.4017

100 0.6593

Median-effect parameters:

cetuximab

µg/mL

Dm: 68.24735

lower 95%: 43.58582

upper 95%: 106.86278

m: 0.91766 +/- 0.067240

y-int: -1.6831 +/- 0.075928

r: 0.98427

CCSI: -0.67605

-----

Drug: resveratrol

Data points entered:

resveratrol      Fraction affected

µg/mL

0.1      0.0413

0.5      0.1153

1        0.1980

2        0.2927

5        0.4697

10       0.6163

20       0.6720

50       0.8753

Median-effect parameters:

resveratrol

µg/mL

Dm: 5.81648

lower 95%: 5.04022

upper 95%: 6.71230

m: 0.79829 +/- 0.028621

y-int: -0.61042 +/- 0.027245

r: 0.99617

CCSI: -0.48573

-----  
Drug: combination

Combination: cetuximab    resveratrol

Ratio: 2:1

Data points entered:

| cetuximab<br>(µg/mL) | resveratrol<br>(µg/mL) | Fraction affected |
|----------------------|------------------------|-------------------|
| 0.2                  | 0.1                    | 0.0587            |
| 1                    | 0.5                    | 0.1640            |
| 2                    | 1                      | 0.2720            |
| 4                    | 2                      | 0.3747            |
| 10                   | 5                      | 0.5790            |
| 20                   | 10                     | 0.7163            |
| 40                   | 20                     | 0.8393            |
| 100                  | 50                     | 0.9123            |

Median-effect parameters:

|           |             |
|-----------|-------------|
| cetuximab | resveratrol |
| (µg/mL)   | (µg/mL)     |



Dm: 6.39946 3.19973  
lower 95%: 5.91073 2.95536  
upper 95%: 6.92860 3.46430

m: 0.83860 +/- 0.017718  
y-int: -0.67603 +/- 0.020007  
r: 0.99866  
CCSI: -0.67605

---

Title:

Date:

Investigator:

Filename: High-CT26-shRNA-CTX+RES.csn

---

#### Summary table

Drug Combination Index Values at

|                     | ED50    | ED75 | ED90 | Dm      | m        | r        |         |
|---------------------|---------|------|------|---------|----------|----------|---------|
| cetuximab           | N/A     | N/A  | N/A  | N/A     | 72.91511 | 0.93855  | 0.97948 |
| (Not a combination) |         |      |      |         |          |          |         |
| resveratrol         | N/A     | N/A  | N/A  | N/A     | 10.33991 | 0.80367  | 0.98275 |
| (Not a combination) |         |      |      |         |          |          |         |
| combination         | 1.02721 |      |      | 1.06991 | 1.12261  | 16.54902 | 0.80728 |
|                     | 0.99917 |      |      |         |          |          |         |

(2:1)

---

Drug: cetuximab

Data points entered:

cetuximab Fraction affected

µg/mL

0.2 0.0060

|     |        |
|-----|--------|
| 1   | 0.0087 |
| 2   | 0.0417 |
| 4   | 0.0747 |
| 10  | 0.1140 |
| 20  | 0.1670 |
| 40  | 0.3807 |
| 100 | 0.6533 |

Median-effect parameters:

cetuximab

$\mu\text{g/mL}$

Dm: 72.91511

lower 95%: 43.22985

upper 95%: 122.98480

m: 0.93855 +/- 0.078849

y-int: -1.7483 +/- 0.089037

r: 0.97948

CCSI: -0.67605

-----  
Drug: resveratrol

Data points entered:

resveratrol    Fraction affected

$\mu\text{g/mL}$

0.1    0.0290

0.5    0.0770

1    0.1460

2    0.2143

5 0.2630  
10 0.4107  
20 0.6150  
50 0.8593

Median-effect parameters:

resveratrol

µg/mL

Dm: 10.33991

lower 95%: 7.31352

upper 95%: 14.61864

m: 0.80367 +/- 0.061752

y-int: -0.81533 +/- 0.058782

r: 0.98275

CCSI: -0.48573

-----  
Drug: combination

Combination: cetuximab resveratrol

Ratio: 2:1

Data points entered:

| cetuximab<br>(µg/mL) | resveratrol<br>(µg/mL) | Fraction affected |
|----------------------|------------------------|-------------------|
| 0.2                  | 0.1                    | 0.0267            |
| 1                    | 0.5                    | 0.0963            |
| 2                    | 1                      | 0.1567            |
| 4                    | 2                      | 0.2587            |
| 10                   | 5                      | 0.3847            |

|     |    |        |
|-----|----|--------|
| 20  | 10 | 0.5203 |
| 40  | 20 | 0.6567 |
| 100 | 50 | 0.8233 |

Median-effect parameters:

|            |                      |                      |
|------------|----------------------|----------------------|
|            | cetuximab            | resveratrol          |
|            | ( $\mu\text{g/mL}$ ) | ( $\mu\text{g/mL}$ ) |
| Dm:        | 16.54902             | 8.27451              |
| lower 95%: | 15.41344             | 7.70672              |
| upper 95%: | 17.76825             | 8.88413              |

m: 0.80728 +/- 0.013406

y-int: -0.9839 +/- 0.015138

r: 0.99917

CCSI: -0.67605

---

Title:

Date:

Investigator:

Filename: Low-HCT116-CTX+RES.csn

---

Summary table

Drug Combination Index Values at

|                     | ED50    | ED75 | ED90 | Dm      | m        | r        |
|---------------------|---------|------|------|---------|----------|----------|
| cetuximab           | N/A     | N/A  | N/A  | N/A     | 97.52552 | 0.94929  |
| (Not a combination) |         |      |      |         |          | 0.97453  |
| resveratrol         | N/A     | N/A  | N/A  | N/A     | 10.16198 | 0.79468  |
| (Not a combination) |         |      |      |         |          | 0.97736  |
| combination         | 0.70514 |      |      | 0.73614 | 0.77491  | 11.85979 |
| (2:1)               | 0.99828 |      |      |         |          | 0.79446  |



---

Drug: cetuximab

Data points entered:

cetuximab      Fraction affected

µg/mL

0.2      0.0060

1      0.0077

2      0.0203

4      0.0353

10      0.0820

20      0.1430

40      0.3627

100      0.6200

Median-effect parameters:

    cetuximab

    µg/mL

Dm: 97.52552

lower 95%: 52.03750

upper 95%: 182.77641

m: 0.94929 +/- 0.089187

y-int: -1.8882 +/- 0.100710

r: 0.97453

CCSI: -0.67605

---

Drug: resveratrol

Data points entered:

resveratrol      Fraction affected

µg/mL

0.1      0.0317

0.5      0.0900

1        0.1517

2        0.1823

5        0.2443

10       0.4200

20       0.6463

50       0.8620

Median-effect parameters:

resveratrol

µg/mL

Dm: 10.16198

lower 95%: 6.83443

upper 95%: 15.10967

m: 0.79468 +/- 0.070239

y-int: -0.80022 +/- 0.066861

r: 0.97736

CCSI: -0.48573

---

Drug: combination

Combination: cetuximab      resveratrol

Ratio: 2:1

Data points entered:

| cetuximab |     | resveratrol | Fraction affected |
|-----------|-----|-------------|-------------------|
| (µg/mL)   |     | (µg/mL)     |                   |
| 0.2       | 0.1 |             | 0.0367            |
| 1         | 0.5 |             | 0.1287            |
| 2         | 1   |             | 0.2013            |
| 4         | 2   |             | 0.3150            |
| 10        | 5   |             | 0.4297            |
| 20        | 10  |             | 0.5677            |
| 40        | 20  |             | 0.7370            |
| 100       | 50  |             | 0.8543            |

Median-effect parameters:

|            | cetuximab | resveratrol |
|------------|-----------|-------------|
|            | (µg/mL)   | (µg/mL)     |
| Dm:        | 11.85979  | 5.92990     |
| lower 95%: | 10.77215  | 5.38608     |
| upper 95%: | 13.05725  | 6.52863     |

m: 0.79446 +/- 0.019065

y-int: -0.85331 +/- 0.021528

r: 0.99828

CCSI: -0.67605

Title:

Date:

Investigator:

Filename: Low-HCT116-control-shRNA-CTX+RES.csn

Summary table

Drug Combination Index Values at

|                     | ED50    | ED75 | ED90 | Dm      | m        | r        |         |  |
|---------------------|---------|------|------|---------|----------|----------|---------|--|
| cetuximab           | N/A     | N/A  | N/A  | N/A     | 98.12426 | 0.90207  | 0.97185 |  |
| (Not a combination) |         |      |      |         |          |          |         |  |
| resveratrol         | N/A     | N/A  | N/A  | N/A     | 11.28361 | 0.75138  | 0.99569 |  |
| (Not a combination) |         |      |      |         |          |          |         |  |
| combination         | 0.62477 |      |      | 0.59677 | 0.57603  | 11.46301 | 0.80435 |  |
|                     | 0.99860 |      |      |         |          |          |         |  |
| (2:1)               |         |      |      |         |          |          |         |  |

---

Drug: cetuximab

Data points entered:

cetuximab      Fraction affected

µg/mL

0.2      0.0077

1      0.0086

2      0.0270

4      0.0377

10      0.0867

20      0.1837

40      0.4247

100      0.5420

Median-effect parameters:

cetuximab

µg/mL

Dm: 98.12426

lower 95%: 50.57940

upper 95%: 190.36150

m: 0.90207 +/- 0.089278

y-int: -1.7967 +/- 0.100814

r: 0.97185

CCSI: -0.67605

---

Drug: resveratrol

Data points entered:

resveratrol      Fraction affected

µg/mL

0.1      0.0277

0.5      0.0870

1        0.1640

2        0.2177

5        0.3010

10       0.4340

20       0.6270

50       0.7753

Median-effect parameters:

resveratrol

µg/mL

Dm: 11.28361

lower 95%: 9.47212

upper 95%: 13.44155

m: 0.75138 +/- 0.028562

y-int: -0.79079 +/- 0.027189

r: 0.99569

CCSI: -0.48573

---

Drug: combination

Combination: cetuximab    resveratrol

Ratio: 2:1

Data points entered:

| cetuximab<br>( $\mu\text{g/mL}$ ) | resveratrol<br>( $\mu\text{g/mL}$ ) | Fraction affected |
|-----------------------------------|-------------------------------------|-------------------|
| 0.2                               | 0.1                                 | 0.0347            |
| 1                                 | 0.5                                 | 0.1223            |
| 2                                 | 1                                   | 0.2083            |
| 4                                 | 2                                   | 0.3303            |
| 10                                | 5                                   | 0.4737            |
| 20                                | 10                                  | 0.5827            |
| 40                                | 20                                  | 0.7153            |
| 100                               | 50                                  | 0.8587            |

Median-effect parameters:

|            | cetuximab<br>( $\mu\text{g/mL}$ ) | resveratrol<br>( $\mu\text{g/mL}$ ) |
|------------|-----------------------------------|-------------------------------------|
| Dm:        | 11.46301                          | 5.73150                             |
| lower 95%: | 10.51756                          | 5.25878                             |
| upper 95%: | 12.49345                          | 6.24672                             |

m: 0.80435 +/- 0.017372

y-int: -0.85204 +/- 0.019617

r: 0.99860

CCSI: -0.67605

---



Title:

Date:

Investigator:

Filename: Low-HCT116-shRNA-CTX+RES.csn

---

Summary table

Drug Combination Index Values at

|                     | ED50    | ED75 | ED90 | Dm      | m        | r       |          |         |
|---------------------|---------|------|------|---------|----------|---------|----------|---------|
| cetuximab           | N/A     | N/A  | N/A  | N/A     | 96.84722 | 0.90121 | 0.97639  |         |
| (Not a combination) |         |      |      |         |          |         |          |         |
| resveratrol         | N/A     | N/A  | N/A  | N/A     | 11.89915 | 0.74617 | 0.98131  |         |
| (Not a combination) |         |      |      |         |          |         |          |         |
| combination         | 0.91065 |      |      | 0.90420 |          | 0.90837 | 17.39693 | 0.77920 |
|                     | 0.99917 |      |      |         |          |         |          |         |

(2:1)

---

Drug: cetuximab

Data points entered:

cetuximab Fraction affected

µg/mL

0.2 0.0070

1 0.0103

2 0.0317

4 0.0387

10 0.0820

20 0.1573

40 0.3760

100 0.6117

Median-effect parameters:

cetuximab

$\mu\text{g/mL}$

Dm: 96.84722

lower 95%: 52.99995

upper 95%: 176.96968

m: 0.90121 +/- 0.081397

y-int: -1.7899 +/- 0.091914

r: 0.97639

CCSI: -0.67605

-----

Drug: resveratrol

Data points entered:

resveratrol      Fraction affected

$\mu\text{g/mL}$

0.1      0.0353

0.5      0.0907

1        0.1340

2        0.1923

5        0.2486

10       0.4020

20       0.5997

50       0.8300

Median-effect parameters:

resveratrol

$\mu\text{g/mL}$

Dm: 11.89915

lower 95%: 8.19106

upper 95%: 17.28589

m: 0.74617 +/- 0.059734

y-int: -0.80251 +/- 0.056861

r: 0.98131

CCSI: -0.48573

---

Drug: combination

Combination: cetuximab resveratrol

Ratio: 2:1

Data points entered:

| cetuximab<br>( $\mu\text{g/mL}$ ) | resveratrol<br>( $\mu\text{g/mL}$ ) | Fraction affected |
|-----------------------------------|-------------------------------------|-------------------|
| 0.2                               | 0.1                                 | 0.0307            |
| 1                                 | 0.5                                 | 0.0923            |
| 2                                 | 1                                   | 0.1600            |
| 4                                 | 2                                   | 0.2463            |
| 10                                | 5                                   | 0.3730            |
| 20                                | 10                                  | 0.5540            |
| 40                                | 20                                  | 0.6423            |
| 100                               | 50                                  | 0.7997            |

Median-effect parameters:

|     | cetuximab<br>( $\mu\text{g/mL}$ ) | resveratrol<br>( $\mu\text{g/mL}$ ) |
|-----|-----------------------------------|-------------------------------------|
| Dm: | 17.39693                          | 8.69846                             |

lower 95%: 16.18484 8.09242  
upper 95%: 18.69979 9.34989

m: 0.77920 +/- 0.013000  
y-int: -0.96658 +/- 0.014680  
r: 0.99917  
CCSI: -0.67605

---

Title:

Date:

Investigator:

Filename: Low-CT26-CTX+RES.csn

---

#### Summary table

Drug Combination Index Values at

|                     | ED50    | ED75 | ED90    | Dm  | m        | r       |         |
|---------------------|---------|------|---------|-----|----------|---------|---------|
| cetuximab           | N/A     | N/A  | N/A     | N/A | 68.79303 | 0.88867 | 0.97853 |
| (Not a combination) |         |      |         |     |          |         |         |
| resveratrol         | N/A     | N/A  | N/A     | N/A | 6.14783  | 0.78495 | 0.99735 |
| (Not a combination) |         |      |         |     |          |         |         |
| combination         | 0.69697 |      | 0.67064 |     | 0.64779  | 7.27023 | 0.82321 |
|                     | 0.99911 |      |         |     |          |         |         |

(2:1)

---

Drug: cetuximab

Data points entered:

cetuximab Fraction affected

µg/mL

0.2 0.0090

1 0.0120

|     |        |
|-----|--------|
| 2   | 0.0467 |
| 4   | 0.0833 |
| 10  | 0.1297 |
| 20  | 0.1853 |
| 40  | 0.4063 |
| 100 | 0.6697 |

Median-effect parameters:

cetuximab

$\mu\text{g/mL}$

Dm: 68.79303

lower 95%: 40.60065

upper 95%: 116.56169

m: 0.88867 +/- 0.076421

y-int: -1.633 +/- 0.086296

r: 0.97853

CCSI: -0.67605

-----  
Drug: resveratrol

Data points entered:

resveratrol    Fraction affected

$\mu\text{g/mL}$

0.1    0.0380

0.5    0.1230

1    0.1933

2    0.2843

5    0.4757

10 0.6233  
20 0.6620  
50 0.8520

Median-effect parameters:

resveratrol

µg/mL

Dm: 6.14783

lower 95%: 5.45202

upper 95%: 6.93244

m: 0.78495 +/- 0.023374

y-int: -0.61911 +/- 0.022250

r: 0.99735

CCSI: -0.48573

-----  
Drug: combination

Combination: cetuximab resveratrol

Ratio: 2:1

Data points entered:

| cetuximab<br>(µg/mL) | resveratrol<br>(µg/mL) | Fraction affected |
|----------------------|------------------------|-------------------|
| 0.2                  | 0.1                    | 0.0503            |
| 1                    | 0.5                    | 0.1650            |
| 2                    | 1                      | 0.2443            |
| 4                    | 2                      | 0.3677            |
| 10                   | 5                      | 0.5767            |
| 20                   | 10                     | 0.7003            |



40 20 0.8216  
 100 50 0.8867

Median-effect parameters:

|            |                      |                      |
|------------|----------------------|----------------------|
|            | cetuximab            | resveratrol          |
|            | ( $\mu\text{g/mL}$ ) | ( $\mu\text{g/mL}$ ) |
| Dm:        | 7.27023              | 3.63512              |
| lower 95%: | 6.81250              | 3.40625              |
| upper 95%: | 7.75871              | 3.87936              |

m: 0.82321 +/- 0.014157  
 y-int: -0.70924 +/- 0.015987  
 r: 0.99911  
 CCSI: -0.67605

Title:

Date:

Investigator:

Filename: Low-CT26-control-shRNA-CTX+RES.csn

Summary table

Drug Combination Index Values at

|                     | ED50    | ED75 | ED90 | Dm      | m        | r       |
|---------------------|---------|------|------|---------|----------|---------|
| cetuximab           | N/A     | N/A  | N/A  | N/A     | 69.59423 | 0.92630 |
| (Not a combination) |         |      |      |         |          |         |
| resveratrol         | N/A     | N/A  | N/A  | N/A     | 5.77327  | 0.78525 |
| (Not a combination) |         |      |      |         |          |         |
| combination         | 0.66192 |      |      | 0.64859 | 0.63961  | 6.55533 |
|                     | 0.99951 |      |      |         |          | 0.81652 |

(2:1)

Drug: cetuximab

Data points entered:

cetuximab      Fraction affected

µg/mL

0.2      0.0060

1      0.0110

2      0.0450

4      0.0803

10      0.1280

20      0.1683

40      0.4007

100      0.6473

Median-effect parameters:

    cetuximab

    µg/mL

Dm:   69.59423

lower 95%:   44.31742

upper 95%:   109.28788

m:      0.92630 +/- 0.067975

y-int: -1.7068 +/- 0.076758

r:      0.98423

CCSI: -0.67605

---

Drug: resveratrol

Data points entered:

resveratrol      Fraction affected

µg/mL

0.1      0.0477

0.5      0.1133

1        0.1893

2        0.3007

5        0.4527

10       0.6230

20       0.6917

50       0.8703

Median-effect parameters:

resveratrol

µg/mL

Dm: 5.77327

lower 95%: 4.99337

upper 95%: 6.67498

m: 0.78525 +/- 0.028559

y-int: -0.59791 +/- 0.027186

r: 0.99606

CCSI: -0.48573

---

Drug: combination

Combination: cetuximab      resveratrol

Ratio: 2:1

Data points entered:

cetuximab      resveratrol      Fraction affected

| ( $\mu\text{g/mL}$ ) |     | ( $\mu\text{g/mL}$ ) |
|----------------------|-----|----------------------|
| 0.2                  | 0.1 | 0.0560               |
| 1                    | 0.5 | 0.1723               |
| 2                    | 1   | 0.2837               |
| 4                    | 2   | 0.3847               |
| 10                   | 5   | 0.5743               |
| 20                   | 10  | 0.7257               |
| 40                   | 20  | 0.8227               |
| 100                  | 50  | 0.8987               |

Median-effect parameters:

|            | cetuximab            | resveratrol          |
|------------|----------------------|----------------------|
|            | ( $\mu\text{g/mL}$ ) | ( $\mu\text{g/mL}$ ) |
| Dm:        | 6.55533              | 3.27766              |
| lower 95%: | 6.24837              | 3.12418              |
| upper 95%: | 6.87737              | 3.43868              |

m: 0.81652 +/- 0.010407

y-int: -0.66677 +/- 0.011751

r: 0.99951

CCSI: -0.67605

Title:

Date:

Investigator:

Filename: Low-CT26-shRNA-CTX+RES.csn

Summary table

Drug Combination Index Values at

ED50 ED75 ED90 Dm m r

|                     |         |         |         |          |         |         |
|---------------------|---------|---------|---------|----------|---------|---------|
| cetuximab           | N/A     | N/A     | N/A     | 73.59724 | 0.94206 | 0.97525 |
| (Not a combination) |         |         |         |          |         |         |
| resveratrol         | N/A     | N/A     | N/A     | 10.17224 | 0.81295 | 0.98447 |
| (Not a combination) |         |         |         |          |         |         |
| combination         | 1.07422 | 1.14705 | 1.23270 | 17.12160 | 0.79965 |         |
|                     | 0.99909 |         |         |          |         |         |
| (2:1)               |         |         |         |          |         |         |

-----

Drug: cetuximab

Data points entered:

| cetuximab        | Fraction affected |
|------------------|-------------------|
| $\mu\text{g/mL}$ |                   |
| 0.2              | 0.0060            |
| 1                | 0.0081            |
| 2                | 0.0423            |
| 4                | 0.0757            |
| 10               | 0.1073            |
| 20               | 0.1570            |
| 40               | 0.3800            |
| 100              | 0.6637            |

Median-effect parameters:

cetuximab

$\mu\text{g/mL}$

Dm: 73.59724

lower 95%: 41.31652

upper 95%: 131.09897

m: 0.94206 +/- 0.087203

y-int: -1.7587 +/- 0.098470

r: 0.97525

CCSI: -0.67605

---

Drug: resveratrol

Data points entered:

resveratrol      Fraction affected

µg/mL

0.1      0.0290

0.5      0.0697

1        0.1430

2        0.2217

5        0.2777

10      0.4183

20      0.6123

50      0.8600

Median-effect parameters:

resveratrol

µg/mL

Dm: 10.17224

lower 95%: 7.33608

upper 95%: 14.10488

m: 0.81295 +/- 0.059192

y-int: -0.81898 +/- 0.056345

r: 0.98447

CCSI: -0.48573

---

Drug: combination

Combination: cetuximab    resveratrol

Ratio: 2:1

Data points entered:

| cetuximab<br>( $\mu\text{g}/\text{mL}$ ) | resveratrol<br>( $\mu\text{g}/\text{mL}$ ) | Fraction affected |
|------------------------------------------|--------------------------------------------|-------------------|
| 0.2                                      | 0.1                                        | 0.0280            |
| 1                                        | 0.5                                        | 0.0923            |
| 2                                        | 1                                          | 0.1530            |
| 4                                        | 2                                          | 0.2570            |
| 10                                       | 5                                          | 0.3717            |
| 20                                       | 10                                         | 0.5183            |
| 40                                       | 20                                         | 0.6513            |
| 100                                      | 50                                         | 0.8187            |

Median-effect parameters:

|            | cetuximab<br>( $\mu\text{g}/\text{mL}$ ) | resveratrol<br>( $\mu\text{g}/\text{mL}$ ) |
|------------|------------------------------------------|--------------------------------------------|
| Dm:        | 17.12160                                 | 8.56080                                    |
| lower 95%: | 15.87909                                 | 7.93954                                    |
| upper 95%: | 18.46134                                 | 9.23067                                    |

m: 0.79965 +/- 0.013968

y-int: -0.98641 +/- 0.015772

r: 0.99909

CCSI: -0.67605

---

Title:



Date:

Investigator:

Filename: HCT116-empty-vector-CTX+RES.csn

---

### Summary table

Drug Combination Index Values at

|                     | ED50    | ED75 | ED90 | Dm        | m       | r        |         |
|---------------------|---------|------|------|-----------|---------|----------|---------|
| cetuximab           | N/A     | N/A  | N/A  | 107.11325 | 0.90209 | 0.96997  |         |
| (Not a combination) |         |      |      |           |         |          |         |
| resveratrol         | N/A     | N/A  | N/A  | 11.69775  | 0.74044 | 0.97937  |         |
| (Not a combination) |         |      |      |           |         |          |         |
| combination         | 0.63306 |      |      | 0.57806   | 0.53431 | 12.15574 | 0.82006 |
|                     | 0.99789 |      |      |           |         |          |         |

(2:1)

---

Drug: cetuximab

Data points entered:

cetuximab Fraction affected

µg/mL

0.2 0.0077

1 0.0100

2 0.0173

4 0.0387

10 0.0793

20 0.1533

40 0.3630

100 0.5950

Median-effect parameters:

cetuximab

$\mu\text{g/mL}$

Dm: 107.11325

lower 95%: 53.18748

upper 95%: 215.71334

m: 0.90209 +/- 0.092344

y-int: -1.8311 +/- 0.104276

r: 0.96997

CCSI: -0.67605

-----

Drug: resveratrol

Data points entered:

resveratrol      Fraction affected

$\mu\text{g/mL}$

0.1      0.0393

0.5      0.0867

1        0.1397

2        0.1853

5        0.2547

10       0.4013

20       0.6163

50       0.8303

Median-effect parameters:

resveratrol

$\mu\text{g/mL}$

Dm: 11.69775

lower 95%: 7.91048

upper 95%: 17.29824

m: 0.74044 +/- 0.062363

y-int: -0.79086 +/- 0.059364

r: 0.97937

CCSI: -0.48573

---

Drug: combination

Combination: cetuximab resveratrol

Ratio: 2:1

Data points entered:

| cetuximab<br>( $\mu\text{g/mL}$ ) | resveratrol<br>( $\mu\text{g/mL}$ ) | Fraction affected |
|-----------------------------------|-------------------------------------|-------------------|
| 0.2                               | 0.1                                 | 0.0333            |
| 1                                 | 0.5                                 | 0.1077            |
| 2                                 | 1                                   | 0.1853            |
| 4                                 | 2                                   | 0.3317            |
| 10                                | 5                                   | 0.4507            |
| 20                                | 10                                  | 0.5670            |
| 40                                | 20                                  | 0.7133            |
| 100                               | 50                                  | 0.8613            |

Median-effect parameters:

|            | cetuximab<br>( $\mu\text{g/mL}$ ) | resveratrol<br>( $\mu\text{g/mL}$ ) |
|------------|-----------------------------------|-------------------------------------|
| Dm:        | 12.15574                          | 6.07787                             |
| lower 95%: | 10.92432                          | 5.46216                             |

upper 95%: 13.52596 6.76298

m: 0.82006 +/- 0.021759

y-int: -0.88958 +/- 0.024570

r: 0.99789

CCSI: -0.67605

---

Title:

Date:

Investigator:

Filename: HCT116-Cx43-vector-CTX+RES.csn

---

#### Summary table

Drug Combination Index Values at

|                     | ED50    | ED75 | ED90 | Dm      | m        | r       |         |
|---------------------|---------|------|------|---------|----------|---------|---------|
| cetuximab           | N/A     | N/A  | N/A  | N/A     | 7.96164  | 1.16118 | 0.98363 |
| (Not a combination) |         |      |      |         |          |         |         |
| resveratrol         | N/A     | N/A  | N/A  | N/A     | 11.39142 | 0.74514 | 0.98941 |
| (Not a combination) |         |      |      |         |          |         |         |
| combination         | 0.52541 |      |      | 0.60192 | 0.71748  | 3.09983 | 0.91978 |
|                     | 0.99649 |      |      |         |          |         |         |

(2:1)

---

Drug: cetuximab

Data points entered:

cetuximab Fraction affected

µg/mL

0.2 0.0062

1 0.1333

2 0.2317

|     |        |
|-----|--------|
| 4   | 0.3897 |
| 10  | 0.5797 |
| 20  | 0.7183 |
| 40  | 0.8487 |
| 100 | 0.9353 |

Median-effect parameters:

cetuximab

µg/mL

Dm: 7.96164

lower 95%: 5.98902

upper 95%: 10.58398

m: 1.16118 +/- 0.086858

y-int: -1.0462 +/- 0.098081

r: 0.98363

CCSI: -0.67605

-----  
Drug: resveratrol

Data points entered:

resveratrol    Fraction affected

µg/mL

0.1    0.0360

0.5    0.0860

1    0.1397

2    0.1987

5    0.2760

10    0.4243

20 0.6387  
50 0.8033

Median-effect parameters:

resveratrol

µg/mL

Dm: 11.39142

lower 95%: 8.64115

upper 95%: 15.01703

m: 0.74514 +/- 0.044621

y-int: -0.7873 +/- 0.042475

r: 0.98941

CCSI: -0.48573

---

Drug: combination

Combination: cetuximab resveratrol

Ratio: 2:1

Data points entered:

| cetuximab<br>(µg/mL) | resveratrol<br>(µg/mL) | Fraction affected |
|----------------------|------------------------|-------------------|
| 0.2                  | 0.1                    | 0.0950            |
| 1                    | 0.5                    | 0.2117            |
| 2                    | 1                      | 0.3897            |
| 4                    | 2                      | 0.5520            |
| 10                   | 5                      | 0.7240            |
| 20                   | 10                     | 0.8537            |
| 40                   | 20                     | 0.9170            |

100 50 0.9640

Median-effect parameters:

|            | cetuximab            | resveratrol          |
|------------|----------------------|----------------------|
|            | ( $\mu\text{g/mL}$ ) | ( $\mu\text{g/mL}$ ) |
| Dm:        | 3.09983              | 1.54992              |
| lower 95%: | 2.70708              | 1.35354              |
| upper 95%: | 3.54957              | 1.77479              |

m: 0.91978 +/- 0.031540

y-int: -0.45192 +/- 0.035616

r: 0.99649

CCSI: -0.67605

---

Title:

Date:

Investigator:

Filename: CT26-empty-vector-CTX+RES.csn

-----  
Summary table

Drug Combination Index Values at

|                     | ED50    | ED75 | ED90 | Dm      | m        | r       |         |
|---------------------|---------|------|------|---------|----------|---------|---------|
| cetuximab           | N/A     | N/A  | N/A  | N/A     | 67.64049 | 0.90353 | 0.97694 |
| (Not a combination) |         |      |      |         |          |         |         |
| resveratrol         | N/A     | N/A  | N/A  | N/A     | 6.12967  | 0.78644 | 0.99841 |
| (Not a combination) |         |      |      |         |          |         |         |
| combination         | 0.72572 |      |      | 0.70041 | 0.67924  | 7.53176 | 0.82512 |
|                     | 0.99890 |      |      |         |          |         |         |

(2:1)

-----

Drug: cetuximab

Data points entered:

cetuximab      Fraction affected

µg/mL

0.2      0.0087

1      0.0107

2      0.0437

4      0.0823

10      0.1370

20      0.1797

40      0.4197

100      0.6653

Median-effect parameters:

cetuximab

µg/mL

Dm: 67.64049

lower 95%: 39.23108

upper 95%: 116.62273

m: 0.90353 +/- 0.080609

y-int: -1.6536 +/- 0.091024

r: 0.97694

CCSI: -0.67605

---

Drug: resveratrol

Data points entered:

resveratrol      Fraction affected



µg/mL

|     |        |
|-----|--------|
| 0.1 | 0.0397 |
| 0.5 | 0.1130 |
| 1   | 0.1933 |
| 2   | 0.2863 |
| 5   | 0.4937 |
| 10  | 0.6010 |
| 20  | 0.6853 |
| 50  | 0.8477 |

Median-effect parameters:

resveratrol

µg/mL

Dm: 6.12967

lower 95%: 5.58574

upper 95%: 6.72657

m: 0.78644 +/- 0.018127

y-int: -0.61927 +/- 0.017255

r: 0.99841

CCSI: -0.48573

---

Drug: combination

Combination: cetuximab      resveratrol

Ratio: 2:1

Data points entered:

| cetuximab | resveratrol | Fraction affected |
|-----------|-------------|-------------------|
| (µg/mL)   | (µg/mL)     |                   |

|     |     |        |
|-----|-----|--------|
| 0.2 | 0.1 | 0.0497 |
| 1   | 0.5 | 0.1553 |
| 2   | 1   | 0.2333 |
| 4   | 2   | 0.3683 |
| 10  | 5   | 0.5853 |
| 20  | 10  | 0.6826 |
| 40  | 20  | 0.8153 |
| 100 | 50  | 0.8863 |

Median-effect parameters:

|            |           |             |
|------------|-----------|-------------|
|            | cetuximab | resveratrol |
|            | (µg/mL)   | (µg/mL)     |
| Dm:        | 7.53176   | 3.76588     |
| lower 95%: | 7.00527   | 3.50263     |
| upper 95%: | 8.09782   | 4.04891     |

m: 0.82512 +/- 0.015777

y-int: -0.72355 +/- 0.017815

r: 0.99890

CCSI: -0.67605

Title:

Date:

Investigator:

Filename: CT26-Cx43-vector-CTX+RES.csn

Summary table

Drug Combination Index Values at

|           | ED50 | ED75 | ED90 | Dm      | m       | r       |
|-----------|------|------|------|---------|---------|---------|
| cetuximab | N/A  | N/A  | N/A  | 2.82331 | 0.79765 | 0.99076 |

(Not a combination)

|             |     |     |     |         |         |         |
|-------------|-----|-----|-----|---------|---------|---------|
| resveratrol | N/A | N/A | N/A | 6.73193 | 0.75996 | 0.99802 |
|-------------|-----|-----|-----|---------|---------|---------|

(Not a combination)

|             |         |         |         |         |         |
|-------------|---------|---------|---------|---------|---------|
| combination | 0.63490 | 0.67799 | 0.72447 | 1.48180 | 0.75533 |
|             | 0.99537 |         |         |         |         |

(2:1)

---

Drug: cetuximab

Data points entered:

| cetuximab | Fraction affected |
|-----------|-------------------|
|-----------|-------------------|

µg/mL

|     |        |
|-----|--------|
| 0.2 | 0.1490 |
|-----|--------|

|   |        |
|---|--------|
| 1 | 0.2403 |
|---|--------|

|   |        |
|---|--------|
| 2 | 0.3770 |
|---|--------|

|   |        |
|---|--------|
| 4 | 0.5933 |
|---|--------|

|    |        |
|----|--------|
| 10 | 0.7127 |
|----|--------|

|    |        |
|----|--------|
| 20 | 0.8273 |
|----|--------|

|    |        |
|----|--------|
| 40 | 0.8907 |
|----|--------|

|     |        |
|-----|--------|
| 100 | 0.9543 |
|-----|--------|

Median-effect parameters:

cetuximab

µg/mL

Dm: 2.82331

lower 95%: 2.25630

upper 95%: 3.53280

m: 0.79765 +/- 0.044577

y-int: -0.35955 +/- 0.050337

r: 0.99076

CCSI: -0.67605

---

Drug: resveratrol

Data points entered:

resveratrol      Fraction affected

µg/mL

0.1      0.0423

0.5      0.1110

1        0.1813

2        0.2753

5        0.4793

10       0.5970

20       0.6690

50       0.8237

Median-effect parameters:

resveratrol

µg/mL

Dm: 6.73193

lower 95%: 6.05754

upper 95%: 7.48140

m: 0.75996 +/- 0.019556

y-int: -0.62935 +/- 0.018616

r: 0.99802

CCSI: -0.48573

---

Drug: combination

Combination: cetuximab    resveratrol

Ratio: 2:1

Data points entered:

| cetuximab<br>( $\mu\text{g/mL}$ ) | resveratrol<br>( $\mu\text{g/mL}$ ) | Fraction affected |
|-----------------------------------|-------------------------------------|-------------------|
| 0.2                               | 0.1                                 | 0.2210            |
| 1                                 | 0.5                                 | 0.3650            |
| 2                                 | 1                                   | 0.5520            |
| 4                                 | 2                                   | 0.6680            |
| 10                                | 5                                   | 0.7977            |
| 20                                | 10                                  | 0.8770            |
| 40                                | 20                                  | 0.9240            |
| 100                               | 50                                  | 0.9650            |

Median-effect parameters:

|            | cetuximab<br>( $\mu\text{g/mL}$ ) | resveratrol<br>( $\mu\text{g/mL}$ ) |
|------------|-----------------------------------|-------------------------------------|
| Dm:        | 1.48180                           | 0.74090                             |
| lower 95%: | 1.23566                           | 0.61783                             |
| upper 95%: | 1.77698                           | 0.88849                             |

m: 0.75533 +/- 0.029762

y-int: -0.129 +/- 0.033607

r: 0.99537

CCSI: -0.67605

---

Title:

Date:

Investigator:

Filename: Inhibitor-HCT116-CTX+RES.csn

---

Summary table

Drug Combination Index Values at

|                     | ED50    | ED75 | ED90 | Dm      | m         | r        |         |  |
|---------------------|---------|------|------|---------|-----------|----------|---------|--|
| cetuximab           | N/A     | N/A  | N/A  | N/A     | 103.36417 | 0.89867  | 0.96897 |  |
| (Not a combination) |         |      |      |         |           |          |         |  |
| resveratrol         | N/A     | N/A  | N/A  | N/A     | 10.90583  | 0.79597  | 0.98402 |  |
| (Not a combination) |         |      |      |         |           |          |         |  |
| combination         | 0.67483 |      |      | 0.74951 | 0.83576   | 12.15445 | 0.75462 |  |
|                     | 0.99581 |      |      |         |           |          |         |  |

(2:1)

---

Drug: cetuximab

Data points entered:

cetuximab Fraction affected

µg/mL

0.2 0.0077

1 0.0090

2 0.0253

4 0.0397

10 0.0853

20 0.1310

40 0.3767

100 0.6123

Median-effect parameters:

cetuximab

$\mu\text{g/mL}$

Dm: 103.36417

lower 95%: 51.01586

upper 95%: 209.42801

m: 0.89867 +/- 0.093587

y-int: -1.8103 +/- 0.105680

r: 0.96897

CCSI: -0.67605

---

Drug: resveratrol

Data points entered:

resveratrol      Fraction affected

$\mu\text{g/mL}$

0.1      0.0270

0.5      0.0830

1        0.1417

2        0.2073

5        0.2610

10       0.3847

20       0.6240

50       0.8453

Median-effect parameters:

resveratrol

$\mu\text{g/mL}$

Dm: 10.90583

lower 95%: 7.78379

upper 95%: 15.28010

m: 0.79597 +/- 0.058800

y-int: -0.82594 +/- 0.055972

r: 0.98402

CCSI: -0.48573

---

Drug: combination

Combination: cetuximab resveratrol

Ratio: 2:1

Data points entered:

| cetuximab<br>( $\mu\text{g/mL}$ ) | resveratrol<br>( $\mu\text{g/mL}$ ) | Fraction affected |
|-----------------------------------|-------------------------------------|-------------------|
| 0.2                               | 0.1                                 | 0.0447            |
| 1                                 | 0.5                                 | 0.1313            |
| 2                                 | 1                                   | 0.1880            |
| 4                                 | 2                                   | 0.3530            |
| 10                                | 5                                   | 0.4370            |
| 20                                | 10                                  | 0.5587            |
| 40                                | 20                                  | 0.6893            |
| 100                               | 50                                  | 0.8550            |

Median-effect parameters:

|            | cetuximab<br>( $\mu\text{g/mL}$ ) | resveratrol<br>( $\mu\text{g/mL}$ ) |
|------------|-----------------------------------|-------------------------------------|
| Dm:        | 12.15445                          | 6.07722                             |
| lower 95%: | 10.45199                          | 5.22600                             |
| upper 95%: | 14.13420                          | 7.06710                             |



m: 0.75462 +/- 0.028288

y-int: -0.81856 +/- 0.031944

r: 0.99581

CCSI: -0.67605

---

Title:

Date:

Investigator:

Filename: Inhibitor-HCT116-controlshRNA-CTX+RES.csn

---

#### Summary table

Drug Combination Index Values at

|                     | ED50    | ED75 | ED90 | Dm      | m        | r        |         |
|---------------------|---------|------|------|---------|----------|----------|---------|
| cetuximab           | N/A     | N/A  | N/A  | N/A     | 89.48251 | 0.92185  | 0.97457 |
| (Not a combination) |         |      |      |         |          |          |         |
| resveratrol         | N/A     | N/A  | N/A  | N/A     | 11.82383 | 0.73784  | 0.99144 |
| (Not a combination) |         |      |      |         |          |          |         |
| combination         | 0.62158 |      |      | 0.58135 | 0.55308  | 11.62647 | 0.81247 |
|                     | 0.99832 |      |      |         |          |          |         |
| (2:1)               |         |      |      |         |          |          |         |

---

Drug: cetuximab

Data points entered:

cetuximab Fraction affected

µg/mL

0.2 0.0073

1 0.0083

2 0.0273

4 0.0407

|     |        |
|-----|--------|
| 10  | 0.0877 |
| 20  | 0.2090 |
| 40  | 0.4223 |
| 100 | 0.5587 |

Median-effect parameters:

cetuximab

µg/mL

Dm: 89.48251

lower 95%: 48.39723

upper 95%: 165.44580

m: 0.92185 +/- 0.086539

y-int: -1.7992 +/- 0.097720

r: 0.97457

CCSI: -0.67605

---

Drug: resveratrol

Data points entered:

resveratrol    Fraction affected

µg/mL

0.1    0.0327

0.5    0.0817

1    0.1447

2    0.2307

5    0.2710

10    0.4170

20    0.6453

50 0.7717

Median-effect parameters:

resveratrol

$\mu\text{g/mL}$

Dm: 11.82383

lower 95%: 9.20445

upper 95%: 15.18862

m: 0.73784 +/- 0.039675

y-int: -0.79152 +/- 0.037767

r: 0.99144

CCSI: -0.48573

---

Drug: combination

Combination: cetuximab resveratrol

Ratio: 2:1

Data points entered:

| cetuximab<br>( $\mu\text{g/mL}$ ) | resveratrol<br>( $\mu\text{g/mL}$ ) | Fraction affected |
|-----------------------------------|-------------------------------------|-------------------|
| 0.2                               | 0.1                                 | 0.0350            |
| 1                                 | 0.5                                 | 0.1137            |
| 2                                 | 1                                   | 0.1980            |
| 4                                 | 2                                   | 0.3330            |
| 10                                | 5                                   | 0.4617            |
| 20                                | 10                                  | 0.5910            |
| 40                                | 20                                  | 0.7073            |
| 100                               | 50                                  | 0.8637            |

Median-effect parameters:

|            | cetuximab                   | resveratrol                 |
|------------|-----------------------------|-----------------------------|
|            | ( $\mu\text{g}/\text{mL}$ ) | ( $\mu\text{g}/\text{mL}$ ) |
| Dm:        | 11.62647                    | 5.81323                     |
| lower 95%: | 10.57747                    | 5.28873                     |
| upper 95%: | 12.77950                    | 6.38975                     |

m: 0.81247 +/- 0.019231

y-int: -0.86564 +/- 0.021716

r: 0.99832

CCSI: -0.67605

---

Title:

Date:

Investigator:

Filename: Inhibitor-HCT116-shRNA-CTX+RES.csn

-----  
Summary table

Drug Combination Index Values at

|                     | ED50    | ED75 | ED90 | Dm      | m        | r        |
|---------------------|---------|------|------|---------|----------|----------|
| cetuximab           | N/A     | N/A  | N/A  | N/A     | 91.88506 | 0.91428  |
| (Not a combination) |         |      |      |         |          | 0.97285  |
| resveratrol         | N/A     | N/A  | N/A  | N/A     | 11.89922 | 0.75090  |
| (Not a combination) |         |      |      |         |          | 0.98481  |
| combination         | 0.91546 |      |      | 0.91443 | 0.92522  | 17.30464 |
| (2:1)               | 0.99913 |      |      |         |          | 0.78345  |

-----  
Drug: cetuximab

Data points entered:

cetuximab      Fraction affected

µg/mL

0.2      0.0073

1      0.0083

2      0.0320

4      0.0437

10      0.0847

20      0.1620

40      0.3840

100      0.6177

Median-effect parameters:

cetuximab

µg/mL

Dm: 91.88506

lower 95%: 48.45274

upper 95%: 174.24948

m: 0.91428 +/- 0.088790

y-int: -1.795 +/- 0.100262

r: 0.97285

CCSI: -0.67605

---

Drug: resveratrol

Data points entered:

resveratrol      Fraction affected

µg/mL

|     |        |
|-----|--------|
| 0.1 | 0.0323 |
| 0.5 | 0.0890 |
| 1   | 0.1397 |
| 2   | 0.1980 |
| 5   | 0.2583 |
| 10  | 0.4030 |
| 20  | 0.5853 |
| 50  | 0.8270 |

Median-effect parameters:

resveratrol

µg/mL

Dm: 11.89922

lower 95%: 8.50599

upper 95%: 16.64609

m: 0.75090 +/- 0.054041

y-int: -0.80761 +/- 0.051442

r: 0.98481

CCSI: -0.48573

---

Drug: combination

Combination: cetuximab    resveratrol

Ratio: 2:1

Data points entered:

| cetuximab | resveratrol | Fraction affected |
|-----------|-------------|-------------------|
| (µg/mL)   | (µg/mL)     |                   |
| 0.2       | 0.1         | 0.0300            |

|     |     |        |
|-----|-----|--------|
| 1   | 0.5 | 0.0973 |
| 2   | 1   | 0.1583 |
| 4   | 2   | 0.2340 |
| 10  | 5   | 0.3777 |
| 20  | 10  | 0.5527 |
| 40  | 20  | 0.6353 |
| 100 | 50  | 0.8087 |

Median-effect parameters:

|            |                      |                      |
|------------|----------------------|----------------------|
|            | cetuximab            | resveratrol          |
|            | ( $\mu\text{g/mL}$ ) | ( $\mu\text{g/mL}$ ) |
| Dm:        | 17.30464             | 8.65232              |
| lower 95%: | 16.07303             | 8.03651              |
| upper 95%: | 18.63063             | 9.31532              |

m: 0.78345 +/- 0.013379

y-int: -0.97004 +/- 0.015108

r: 0.99913

CCSI: -0.67605

---

Title:

Date:

Investigator:

Filename: Inhibitor-CT26-CTX+RES.csn

---

Summary table

Drug Combination Index Values at

|           | ED50 | ED75 | ED90 | Dm       | m       | r       |
|-----------|------|------|------|----------|---------|---------|
| cetuximab | N/A  | N/A  | N/A  | 70.82971 | 0.90536 | 0.97862 |

(Not a combination)

resveratrol N/A N/A N/A 6.15966 0.77332 0.99820

(Not a combination)

combination 0.72831 0.68269 0.64393 7.64293 0.83076  
0.99943

(2:1)

-----  
Drug: cetuximab

Data points entered:

cetuximab Fraction affected

µg/mL

0.2 0.0077

1 0.0110

2 0.0467

4 0.0770

10 0.1180

20 0.1737

40 0.4067

100 0.6640

Median-effect parameters:

cetuximab

µg/mL

Dm: 70.82971

lower 95%: 41.68715

upper 95%: 120.34518

m: 0.90536 +/- 0.077691

y-int: -1.6751 +/- 0.087729

r: 0.97862



CCSI: -0.67605

---

Drug: resveratrol

Data points entered:

resveratrol      Fraction affected

µg/mL

0.1      0.0397

0.5      0.1197

1        0.1897

2        0.2923

5        0.4860

10       0.6350

20       0.6990

50       0.8200

Median-effect parameters:

resveratrol

µg/mL

Dm: 6.15966

lower 95%: 5.57850

upper 95%: 6.80137

m: 0.77332 +/- 0.018993

y-int: -0.61058 +/- 0.018079

r: 0.99820

CCSI: -0.48573

---

Drug: combination

Combination: cetuximab    resveratrol

Ratio: 2:1

Data points entered:

| cetuximab<br>( $\mu\text{g/mL}$ ) | resveratrol<br>( $\mu\text{g/mL}$ ) | Fraction affected |
|-----------------------------------|-------------------------------------|-------------------|
| 0.2                               | 0.1                                 | 0.0490            |
| 1                                 | 0.5                                 | 0.1543            |
| 2                                 | 1                                   | 0.2453            |
| 4                                 | 2                                   | 0.3533            |
| 10                                | 5                                   | 0.5477            |
| 20                                | 10                                  | 0.6777            |
| 40                                | 20                                  | 0.8140            |
| 100                               | 50                                  | 0.8957            |

Median-effect parameters:

|            | cetuximab<br>( $\mu\text{g/mL}$ ) | resveratrol<br>( $\mu\text{g/mL}$ ) |
|------------|-----------------------------------|-------------------------------------|
| Dm:        | 7.64293                           | 3.82147                             |
| lower 95%: | 7.25445                           | 3.62723                             |
| upper 95%: | 8.05222                           | 4.02611                             |

m: 0.83076 +/- 0.011423

y-int: -0.73377 +/- 0.012899

r: 0.99943

CCSI: -0.67605

---

Title:

Date:

Investigator:

Filename: Inhibitor-CT26-controlshRNA-CTX+RES.csn

---

### Summary table

Drug Combination Index Values at

|                     | ED50    | ED75 | ED90 | Dm      | m        | r       |         |  |
|---------------------|---------|------|------|---------|----------|---------|---------|--|
| cetuximab           | N/A     | N/A  | N/A  | N/A     | 65.78427 | 0.92959 | 0.98627 |  |
| (Not a combination) |         |      |      |         |          |         |         |  |
| resveratrol         | N/A     | N/A  | N/A  | N/A     | 5.73442  | 0.80503 | 0.99751 |  |
| (Not a combination) |         |      |      |         |          |         |         |  |
| combination         | 0.67878 |      |      | 0.66282 | 0.65033  | 6.62911 | 0.83765 |  |
|                     | 0.99749 |      |      |         |          |         |         |  |

(2:1)

---

Drug: cetuximab

Data points entered:

cetuximab Fraction affected

µg/mL

0.2 0.0063

1 0.0120

2 0.0430

4 0.0857

10 0.1247

20 0.1880

40 0.4030

100 0.6650

Median-effect parameters:

cetuximab

µg/mL

Dm: 65.78427

lower 95%: 43.46488

upper 95%: 99.56476

m: 0.92959 +/- 0.063541

y-int: -1.6901 +/- 0.071751

r: 0.98627

CCSI: -0.67605

---

Drug: resveratrol

Data points entered:

resveratrol      Fraction affected

µg/mL

0.1      0.0407

0.5      0.1117

1        0.1917

2        0.3003

5        0.4897

10       0.6157

20       0.6897

50       0.8697

Median-effect parameters:

resveratrol

µg/mL

Dm: 5.73442

lower 95%: 5.11097

upper 95%: 6.43391

m: 0.80503 +/- 0.023246

y-int: -0.61061 +/- 0.022128

r: 0.99751

CCSI: -0.48573

---

Drug: combination

Combination: cetuximab    resveratrol

Ratio: 2:1

Data points entered:

| cetuximab<br>(µg/mL) | resveratrol<br>(µg/mL) | Fraction affected |
|----------------------|------------------------|-------------------|
| 0.2                  | 0.1                    | 0.0597            |
| 1                    | 0.5                    | 0.1647            |
| 2                    | 1                      | 0.2543            |
| 4                    | 2                      | 0.3680            |
| 10                   | 5                      | 0.5543            |
| 20                   | 10                     | 0.7027            |
| 40                   | 20                     | 0.8407            |
| 100                  | 50                     | 0.9137            |

Median-effect parameters:

|            | cetuximab<br>(µg/mL) | resveratrol<br>(µg/mL) |
|------------|----------------------|------------------------|
| Dm:        | 6.62911              | 3.31455                |
| lower 95%: | 5.94349              | 2.97174                |
| upper 95%: | 7.39382              | 3.69691                |

m: 0.83765 +/- 0.024294

y-int: -0.6881 +/- 0.027433

r: 0.99749

CCSI: -0.67605

---

Title:

Date:

Investigator:

Filename: Inhibitor-CT26-shRNA-CTX+RES.csn

---

### Summary table

Drug Combination Index Values at

|                     | ED50    | ED75 | ED90 | Dm      | m        | r        |         |
|---------------------|---------|------|------|---------|----------|----------|---------|
| cetuximab           | N/A     | N/A  | N/A  | N/A     | 68.76697 | 0.96704  | 0.97678 |
| (Not a combination) |         |      |      |         |          |          |         |
| resveratrol         | N/A     | N/A  | N/A  | N/A     | 10.97461 | 0.78020  | 0.98400 |
| (Not a combination) |         |      |      |         |          |          |         |
| combination         | 0.97954 |      |      | 1.03638 | 1.11351  | 16.29815 | 0.78946 |
|                     | 0.99916 |      |      |         |          |          |         |

(2:1)

---

Drug: cetuximab

Data points entered:

cetuximab Fraction affected

µg/mL

0.2 0.0053

1 0.0073

2 0.0440

4 0.0750

10 0.1233

|     |        |
|-----|--------|
| 20  | 0.1647 |
| 40  | 0.3780 |
| 100 | 0.6660 |

Median-effect parameters:

cetuximab

µg/mL

Dm: 68.76697

lower 95%: 39.71363

upper 95%: 119.07489

m: 0.96704 +/- 0.086592

y-int: -1.7768 +/- 0.097781

r: 0.97678

CCSI: -0.67605

---

Drug: resveratrol

Data points entered:

resveratrol    Fraction affected

µg/mL

0.1    0.0323

0.5    0.0760

1    0.1430

2    0.2033

5    0.2633

10    0.4063

20    0.6200

50    0.8410

Median-effect parameters:

resveratrol

µg/mL

Dm: 10.97461

lower 95%: 7.82727

upper 95%: 15.38750

m: 0.78020 +/- 0.057669

y-int: -0.81171 +/- 0.054896

r: 0.98400

CCSI: -0.48573

---

Drug: combination

Combination: cetuximab resveratrol

Ratio: 2:1

Data points entered:

| cetuximab<br>(µg/mL) | resveratrol<br>(µg/mL) | Fraction affected |
|----------------------|------------------------|-------------------|
| 0.2                  | 0.1                    | 0.0310            |
| 1                    | 0.5                    | 0.0980            |
| 2                    | 1                      | 0.1557            |
| 4                    | 2                      | 0.2603            |
| 10                   | 5                      | 0.4033            |
| 20                   | 10                     | 0.5247            |
| 40                   | 20                     | 0.6503            |
| 100                  | 50                     | 0.8240            |



Median-effect parameters:

|            | cetuximab            | resveratrol          |
|------------|----------------------|----------------------|
|            | ( $\mu\text{g/mL}$ ) | ( $\mu\text{g/mL}$ ) |
| Dm:        | 16.29815             | 8.14908              |
| lower 95%: | 15.17337             | 7.58669              |
| upper 95%: | 17.50631             | 8.75316              |

m: 0.78946 +/- 0.013232

y-int: -0.95694 +/- 0.014942

r: 0.99916

CCSI: -0.67605

---
